# Supplementary material for: Synthesis, Hydrolysis, and Protonation-Promoted Intramolecular Reductive Breakdown of Potential NRTIs: Stavudine α-P-Borano-γ-P-N-l-tryptophanyltriphosphates
Source: MDPI journal article supplement (doi:10.3390/molecules201018808), 2015-10-16
Supplement: s1 [file s1]

# Supporting Materials

## Synthesis, Hydrolysis, and Protonation-Promoted Intramolecular Reductive Breakdown of Potential NRTIs: Stavudine $\alpha$ -*P*-Borano- $\gamma$ -*P*-*N*-L-tryptophanyltriphosphates

Zhihong Xu \* and Barbara Ramsay Shaw

Department of Chemistry, Duke University, Durham, NC 27708, USA;

E-Mail: barbara.r.shaw@duke.edu

\* Author to whom correspondence should be addressed; E-Mail: zhihong.xu@duke.edu or zxu@live.unc.edu; Tel.: +1-919-966-5908; Fax: +1-919-660-1605.

### Detailed HPLC Chromatograms and NMR Spectra. Example LC-MS Analyses of Degradation Products

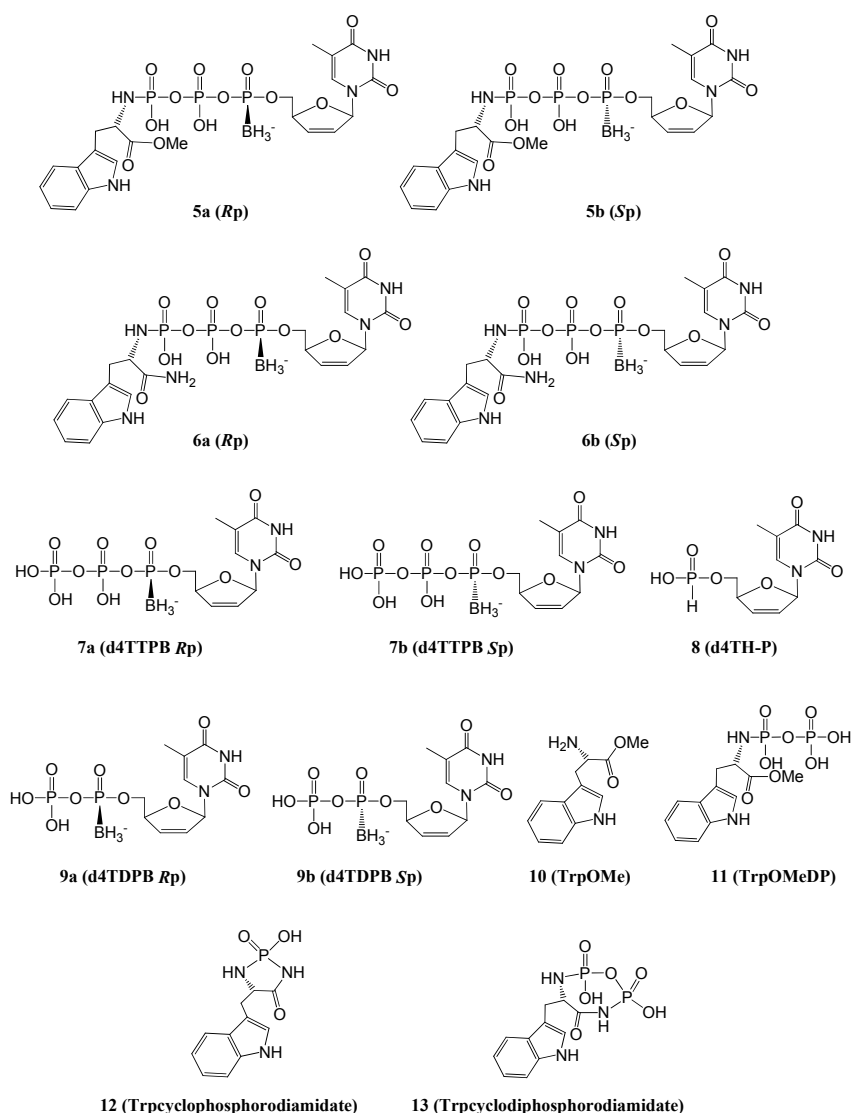

**Chart S1.** Structures of d4T  $\alpha$ -*P*-borano- $\gamma$ -*P*-*N*-L-tryptophanyltriphosphates and major degradation products in Tris buffer.

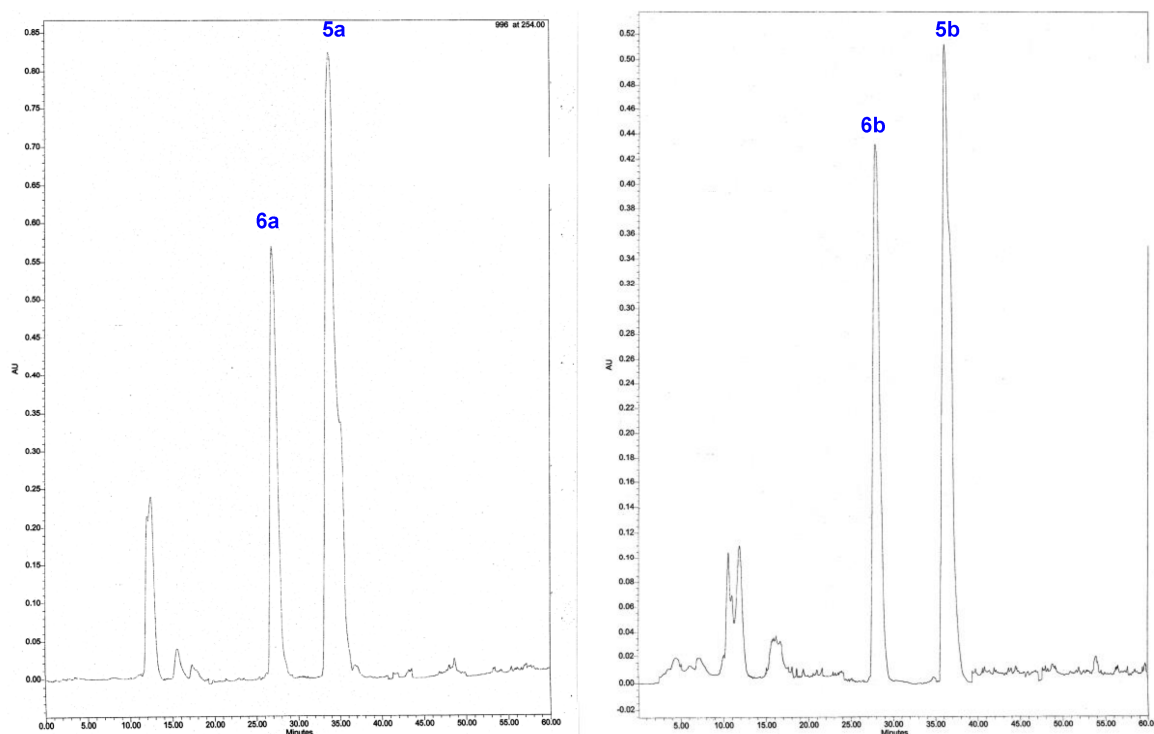

**Figure S1.** Isolation of **6a** and **6b** using HPLC after 17%  $\text{NH}_4\text{OH}$  treatment of the corresponding isomer of **5** at rt for 6 h. Waters™ (Milford, MA, USA) Delta 600E system (XTerra Prep RP-18 Column, 5  $\mu\text{m}$ , 10 mm  $\times$  150 mm, UV detection), 0%–20% B in 40 min, 20%–90% B for an additional 10 min at 3 mL/min (solvent A: 1% acetonitrile (ACN) in 20 mM TEAA, solvent B: 100% ACN).

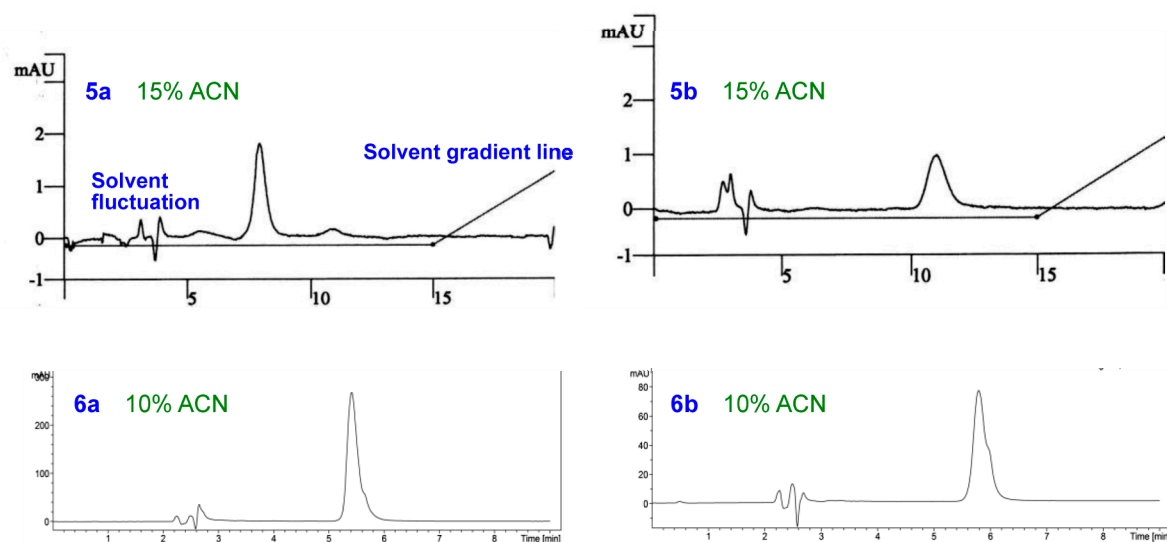

**Figure S2.** HPLC chromatograms of purified compounds **5a**, **5b**, **6a**, and **6b** at  $t = 0$ . Varian (Palo Alto, CA, USA) Star #1, UV detection at 254 nm. Column: Waters Delta-Pak™ C18, 15  $\mu\text{m}$ , 3.9 mm  $\times$  300 mm. Tested at 1 mL/min with isocratic condition of 15% or 10% ACN in 10 mM TEAA (pH 7) before column cleaning.

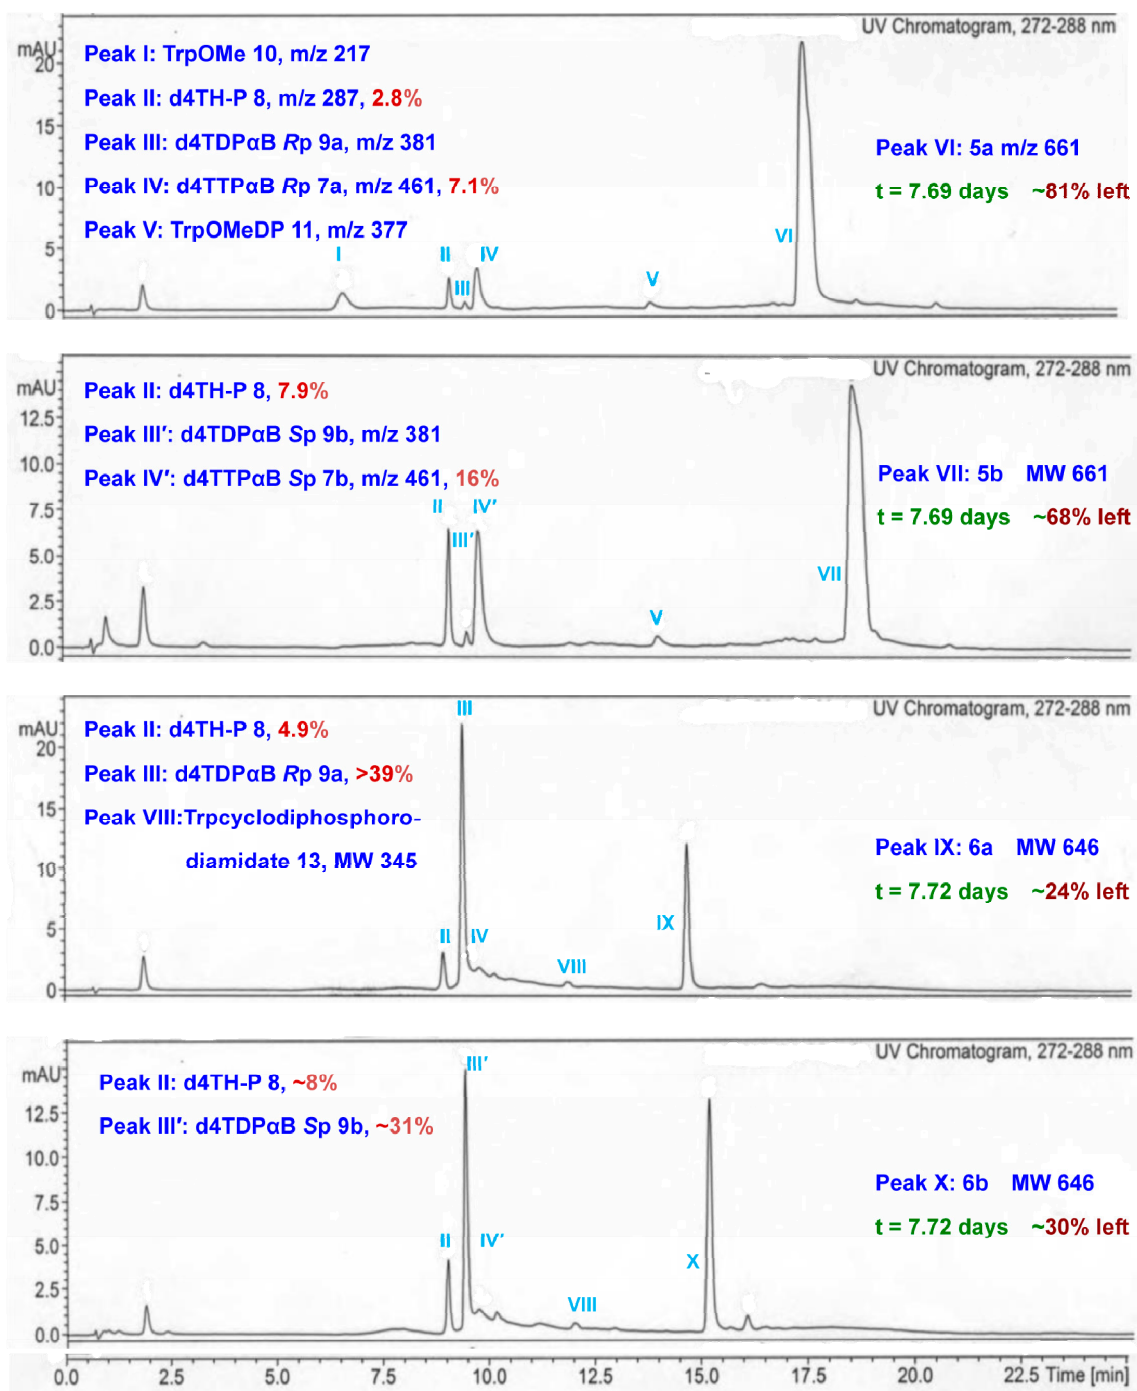

**Figure S3.** LC-MS analyses of 0.03 mM d4T boranotriphosphate analogs **5a**, **5b**, **6a** and **6b** in 4 mM, pH 7.4 Tris buffer at  $37 \pm 0.5$  °C, after ~7.7 day incubation. LC-MS (Agilent, Santa Clara, CA, USA) condition: Eluted at 0.3 mL/min with 0%–25% B in 25 min (Solvent A: 10 mM pH 7 TEAA; Solvent B: ACN). Column: Eclipse XDB C-18,  $2.1 \times 50$  mm ZORBAX, 3.5  $\mu$ m. UV detection at 272–288 nm. MS negative ion detection.

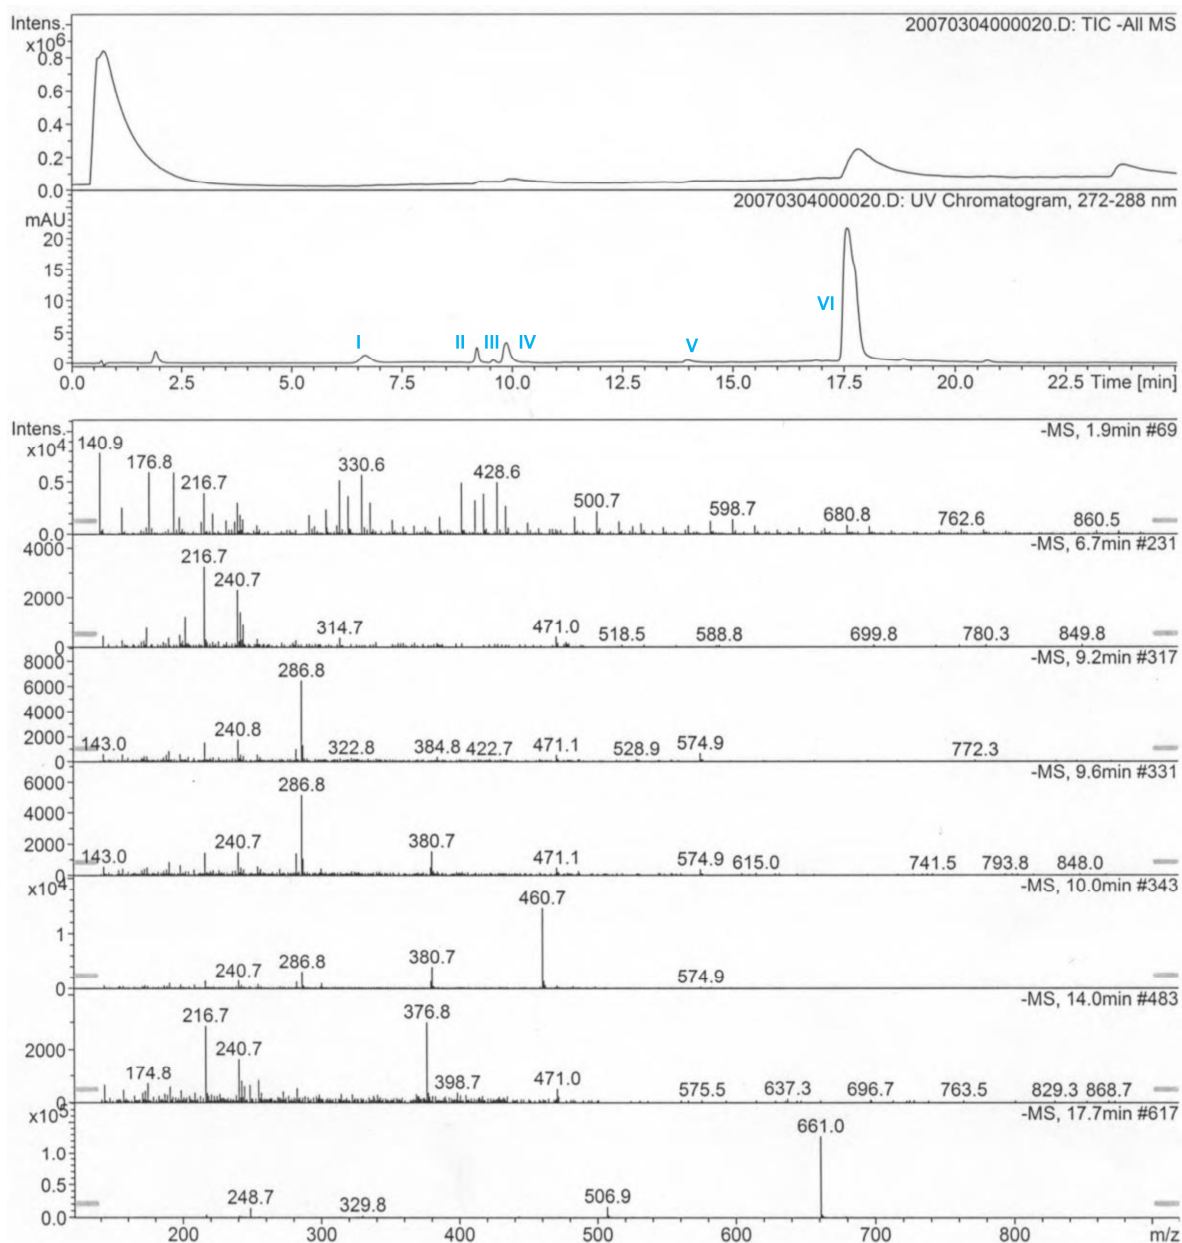

**Figure S4.** LC-MS analysis of 0.03 mM d4T boranotriphosphate analog **5a** in 4 mM, pH 7.4 Tris buffer at 37 ± 0.5 °C, after ~7.7 day incubation. LC-MS condition: as described in Figure S3.



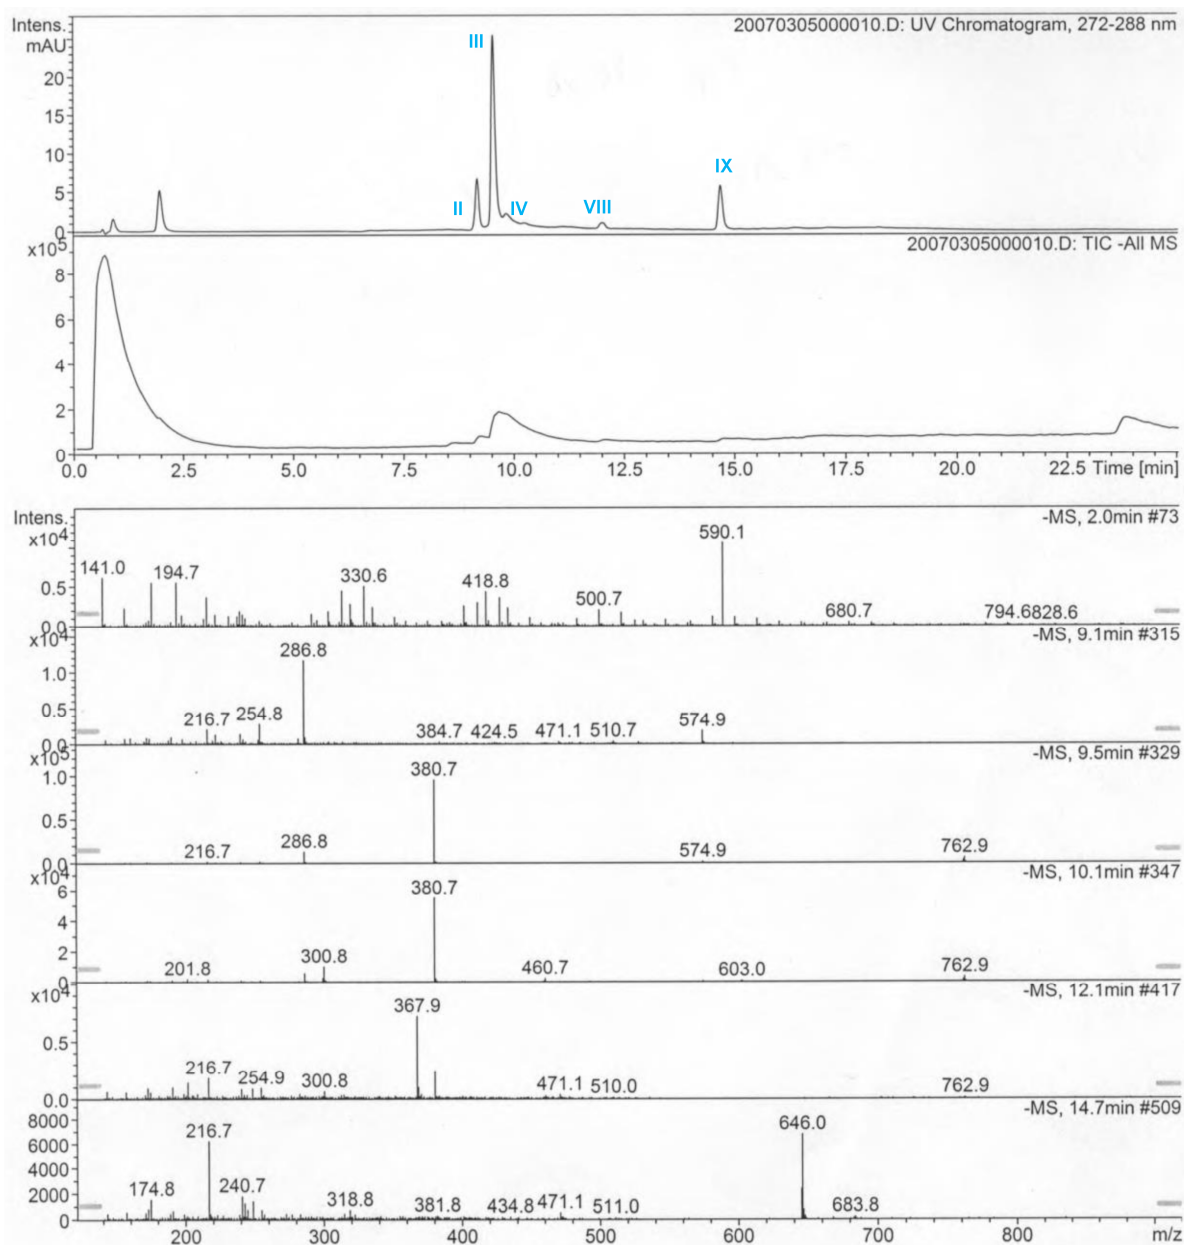

**Figure S5.** LC-MS analysis of 0.03 mM d4T boranotriphosphate analog **6a** in 4 mM, pH 7.4 Tris buffer at  $37 \pm 0.5$  °C, after 16 day incubation. LC-MS condition: as described in Figure S3.

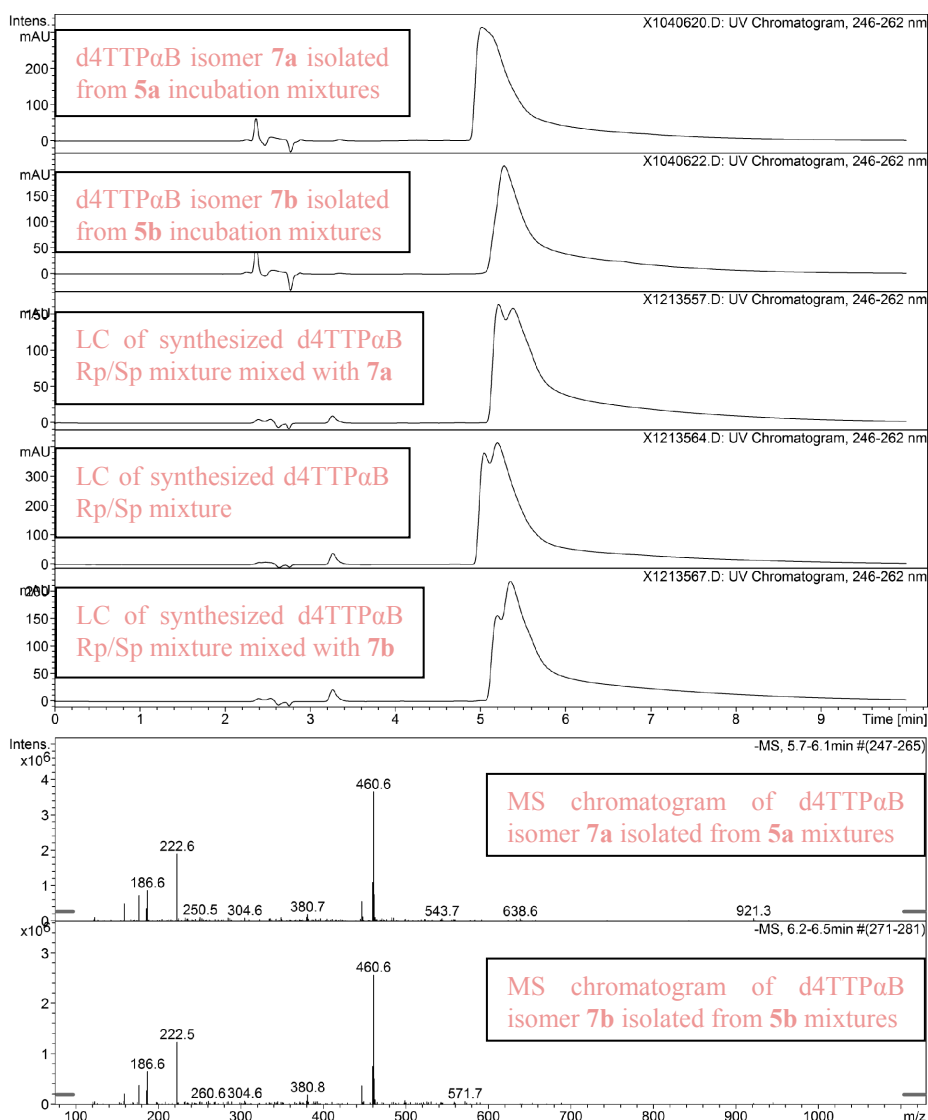

**Figure S6.** LC-MS verification of stereo specificity of the d4TTPαB isomers degraded from **5a** and **5b** incubation mixtures.

Incubation mixtures were the pools of the respective incubation solutions over 0.5–16 days at  $37 \pm 0.5$  °C. LC-MS condition: Eluted at 40  $\mu$ L/min with isocratic 8% B (solvent A: 5% ACN in 20 mM TEAA, solvent B: 90% ACN in H<sub>2</sub>O). Column: Polaris 3 C-18 A 150  $\times$  1.0 mm. UV detection at 190–400 nm. MS negative ion detection. The retention times of the two isolated isomers **7a** and **7b** were very close. As the addition of **7a** to the synthesized d4TTPαB Rp/Sp mixture (wherein the first and the second eluted peaks were assigned as Rp and Sp isomers, respectively) increased the Rp isomer peak area, whereas **7b** increased the Sp isomer peak area, **7a** was considered to be the Rp isomer and **7b** would be the Sp isomer.

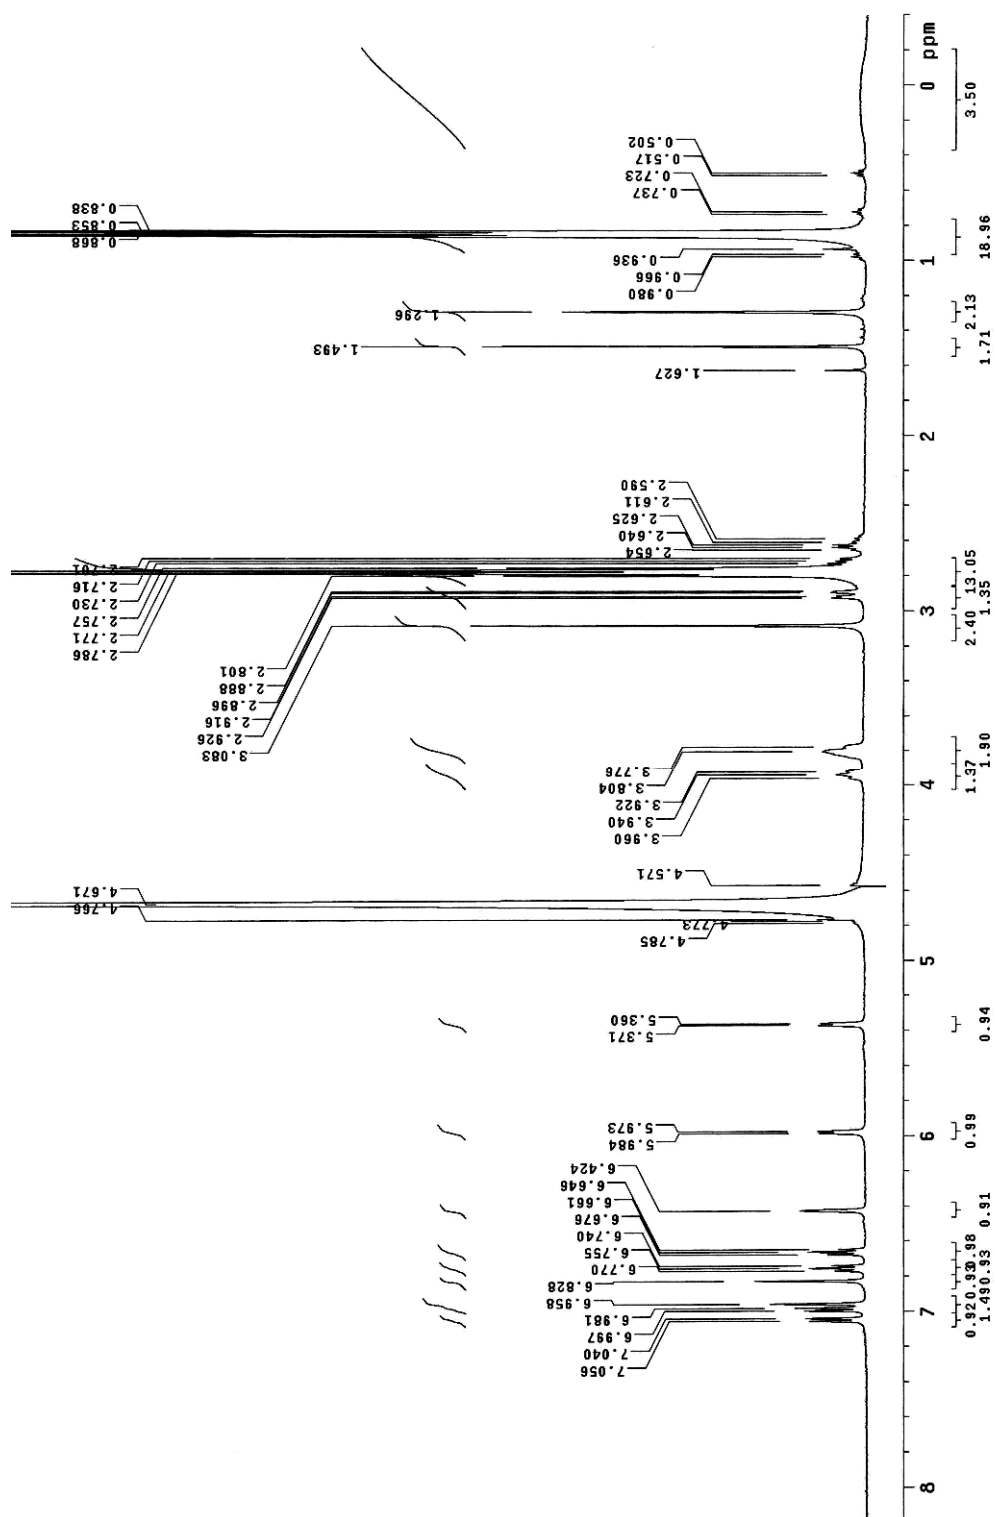

Figure S7. 5a <sup>1</sup>H-NMR in D<sub>2</sub>O 500 MHz 2 °C.

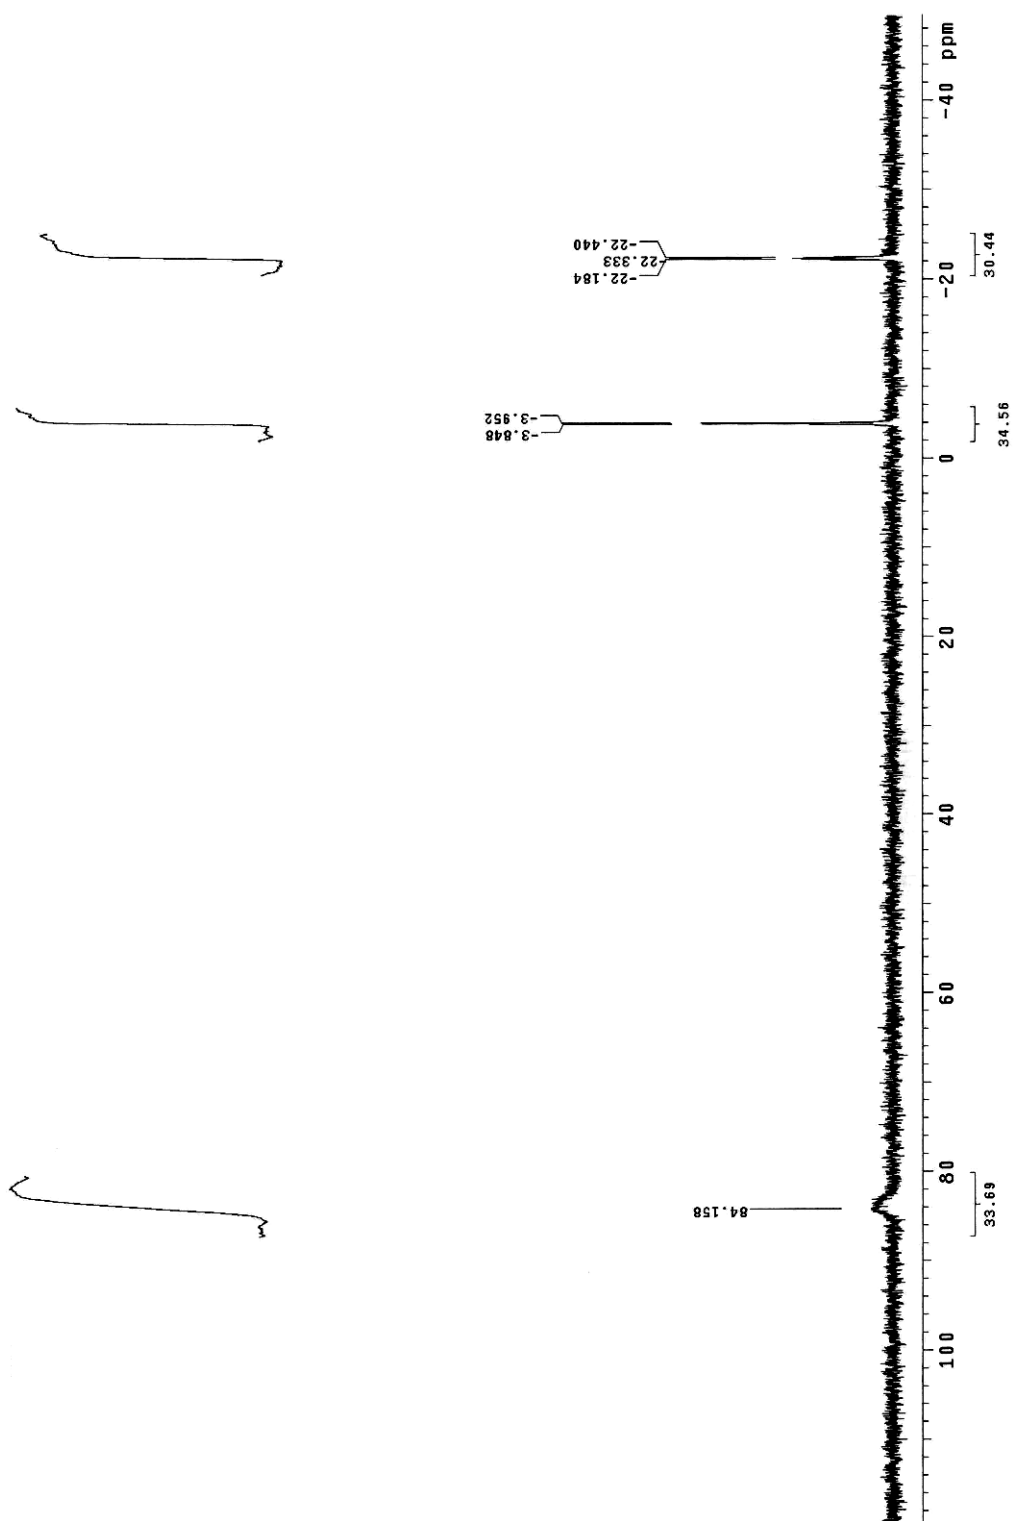

**Figure S8. 5a**  $^{31}\text{P}$ -NMR in  $\text{D}_2\text{O}$  202 MHz  $2^\circ\text{C}$ .

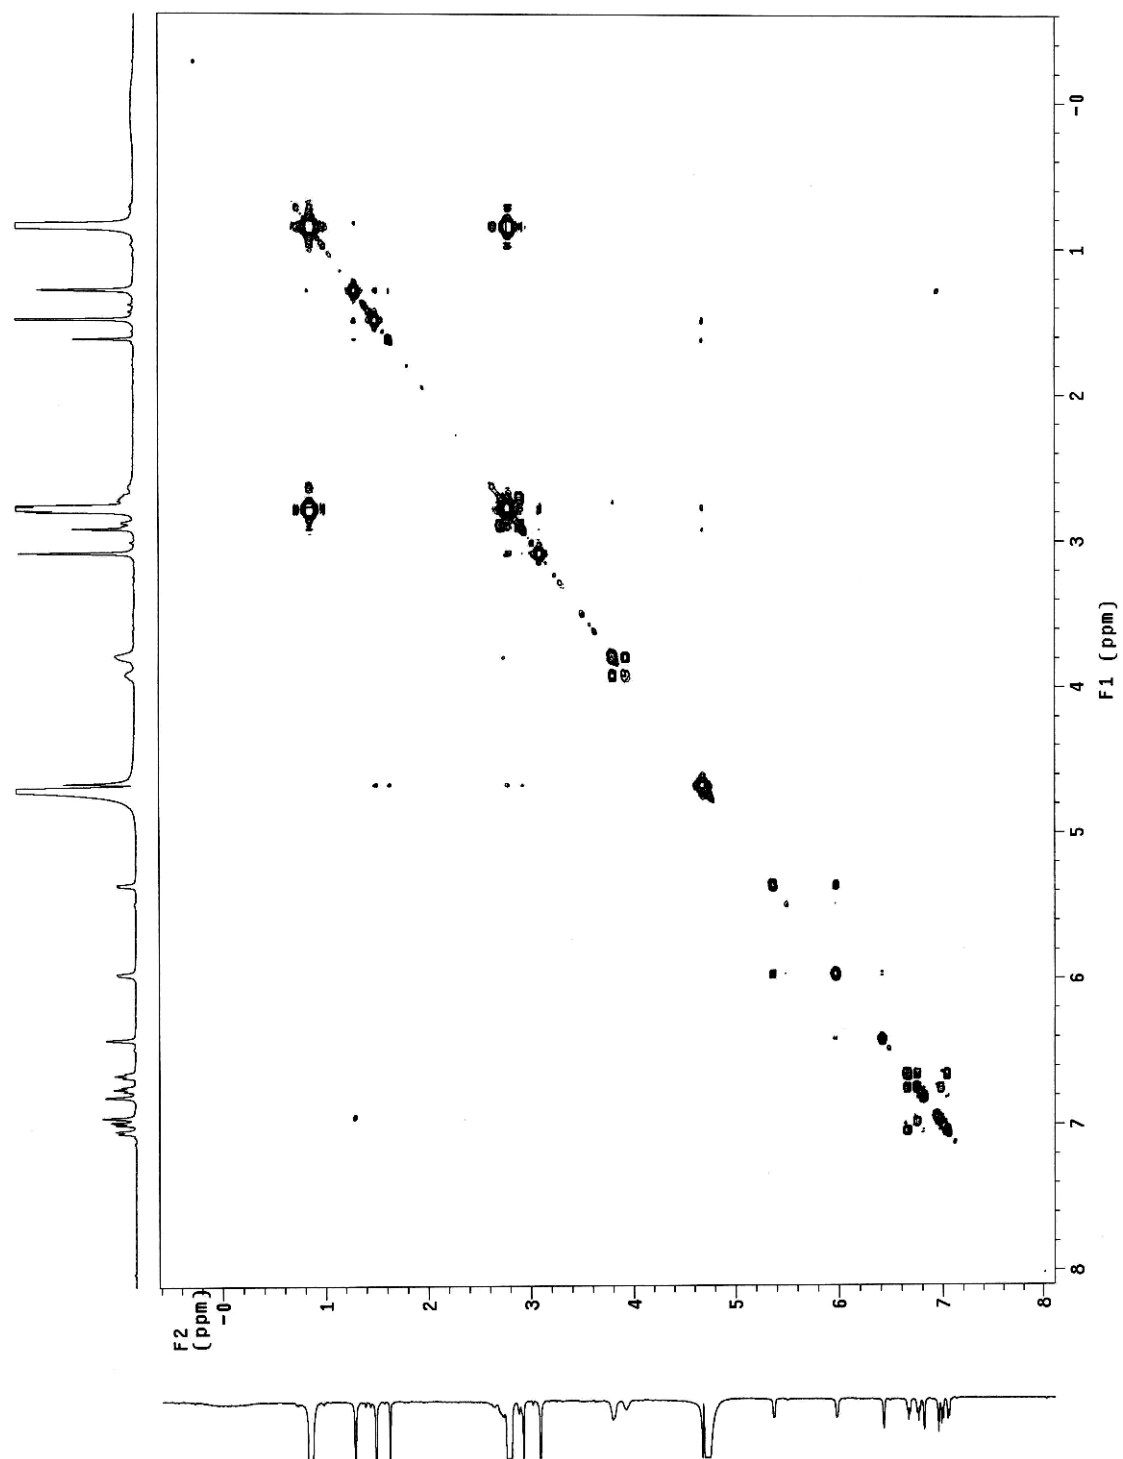

Figure S9. 5a COSY in D<sub>2</sub>O 500 MHz 2 °C.

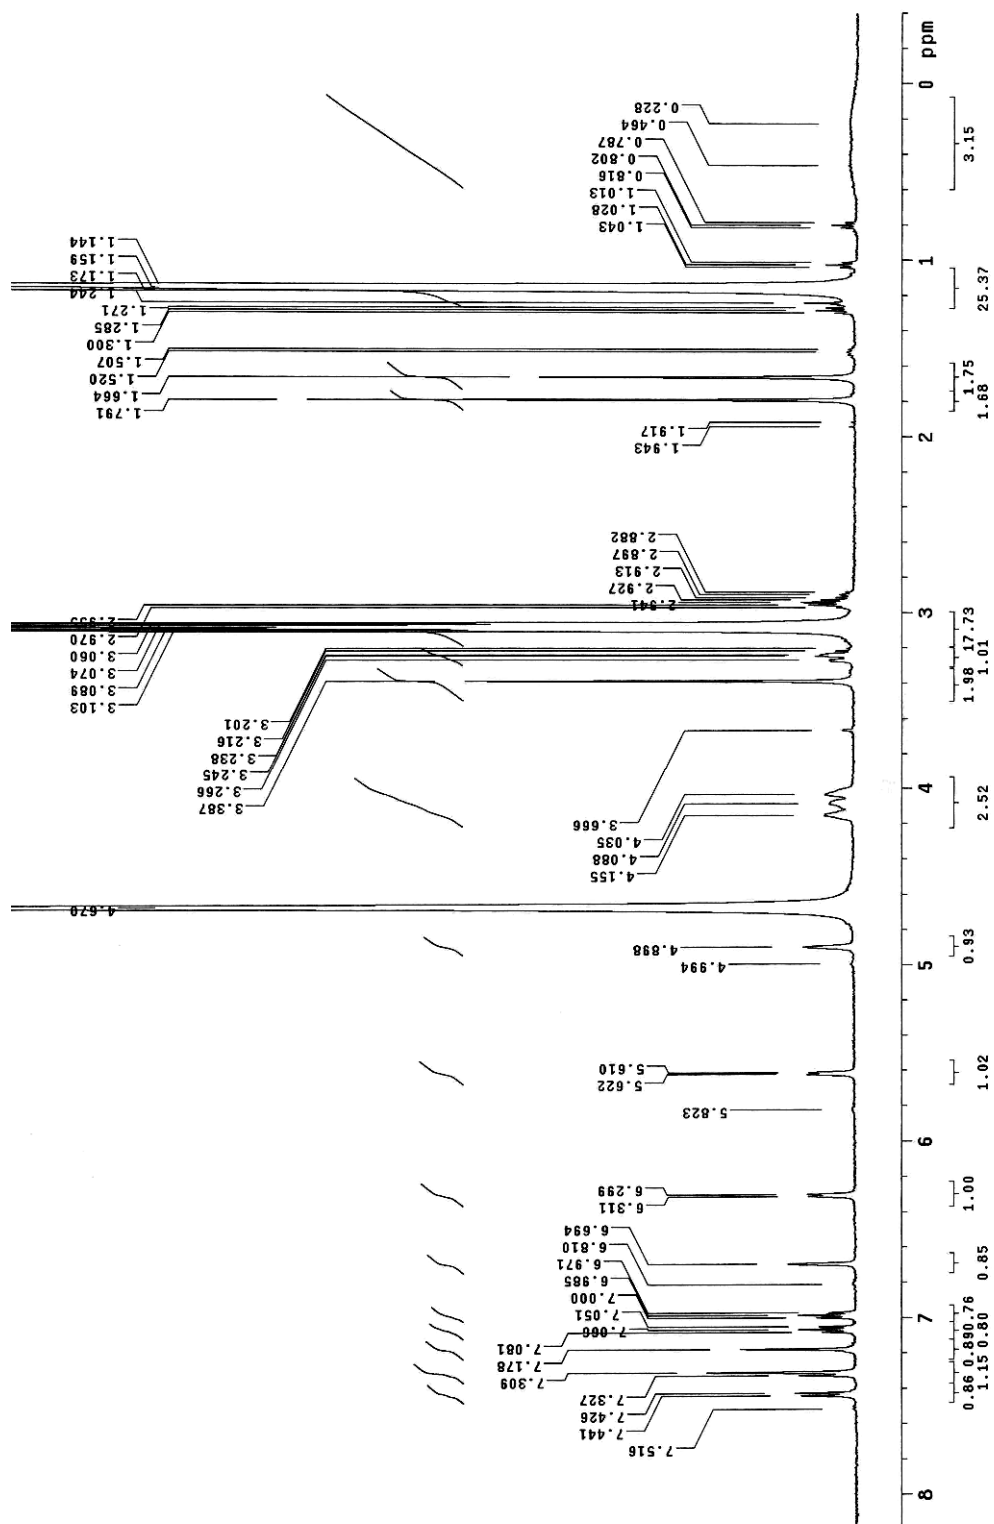

Figure S10. 5b <sup>1</sup>H-NMR in D<sub>2</sub>O 500 MHz 25 °C.

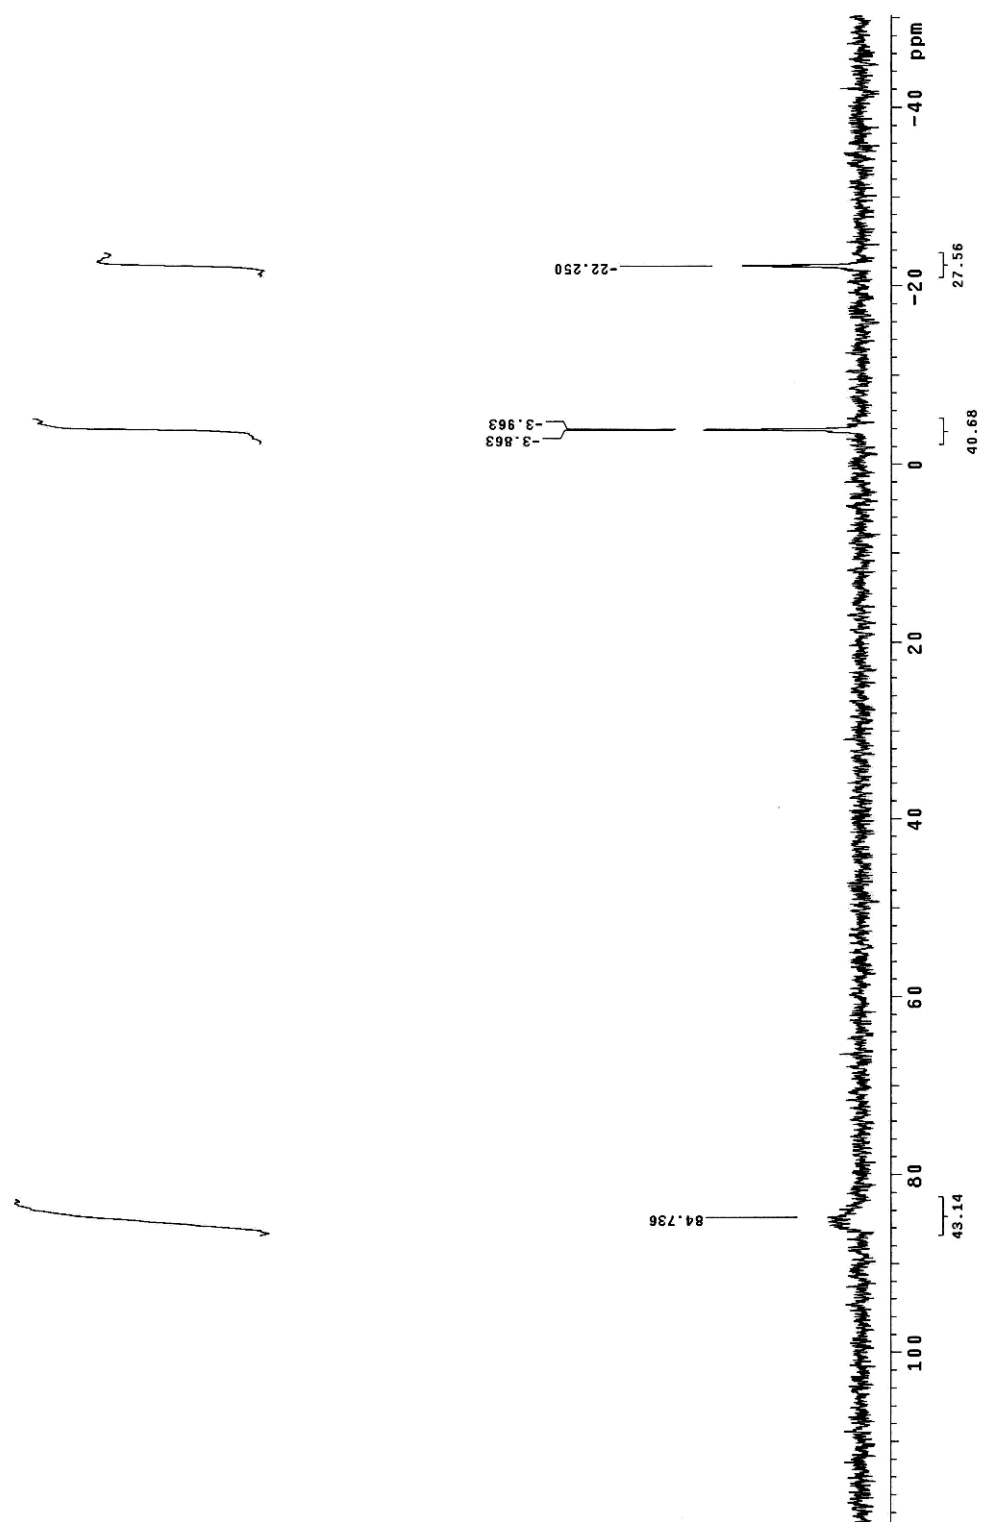

**Figure S11. 5b**  $^{31}\text{P}$ -NMR in  $\text{D}_2\text{O}$  202 MHz 2 °C.



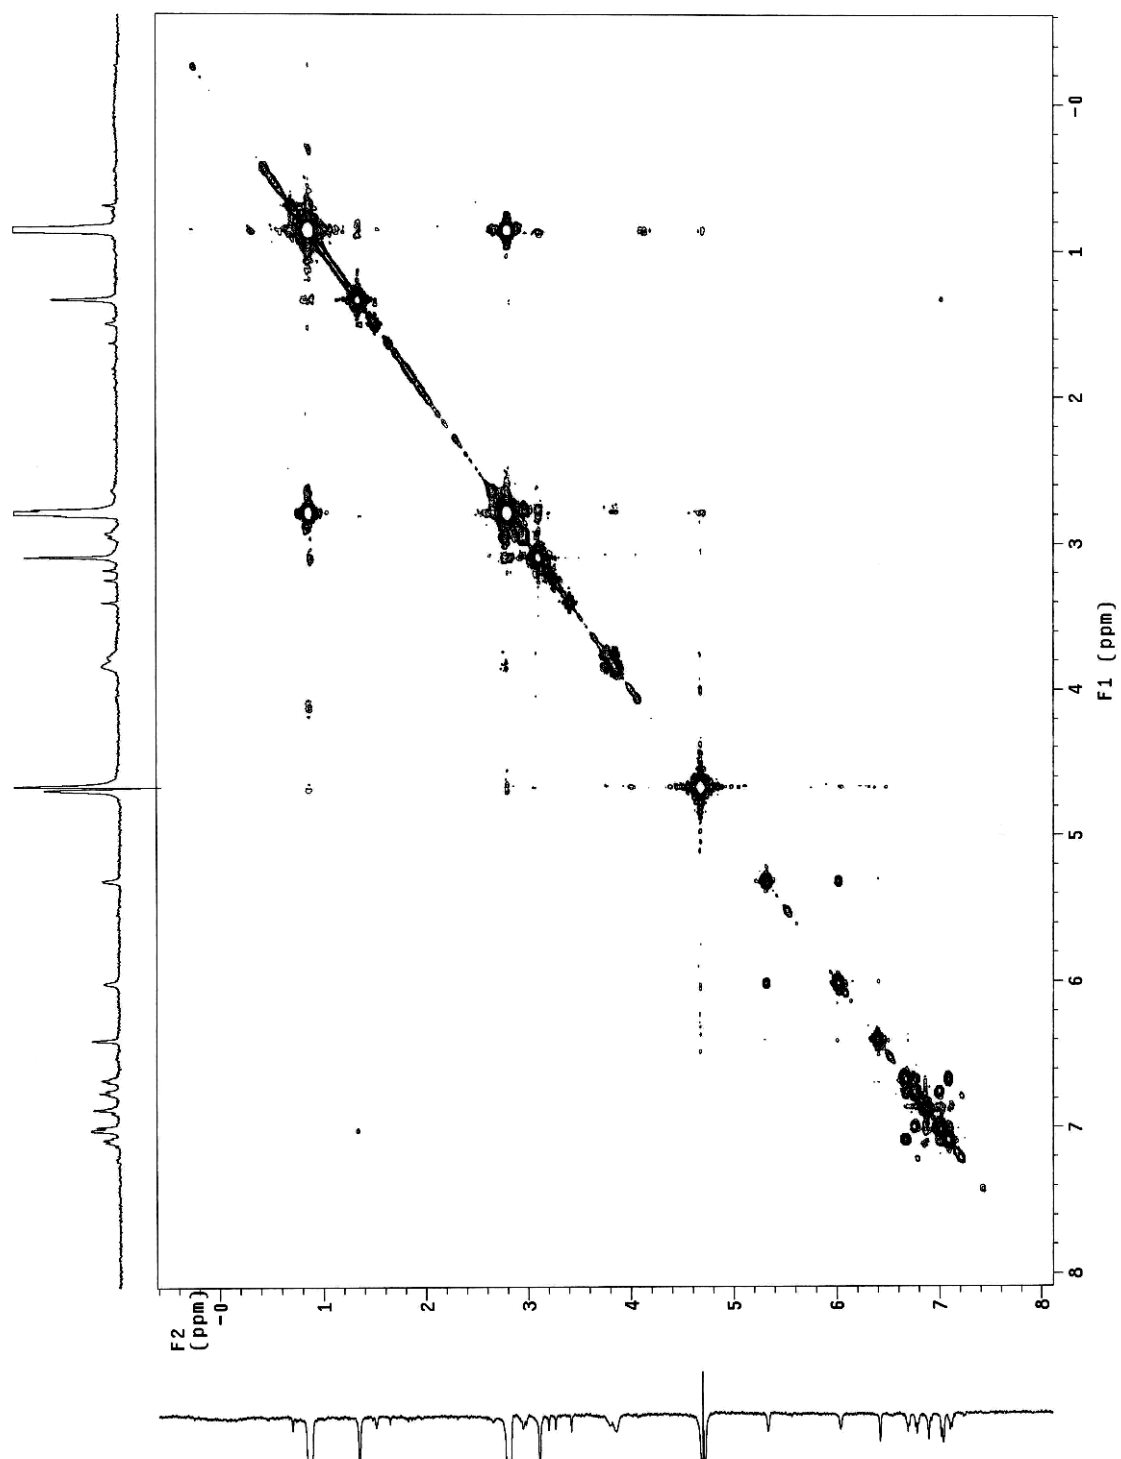

**Figure S12. 5b** COSY in D<sub>2</sub>O 500 MHz 2 °C.

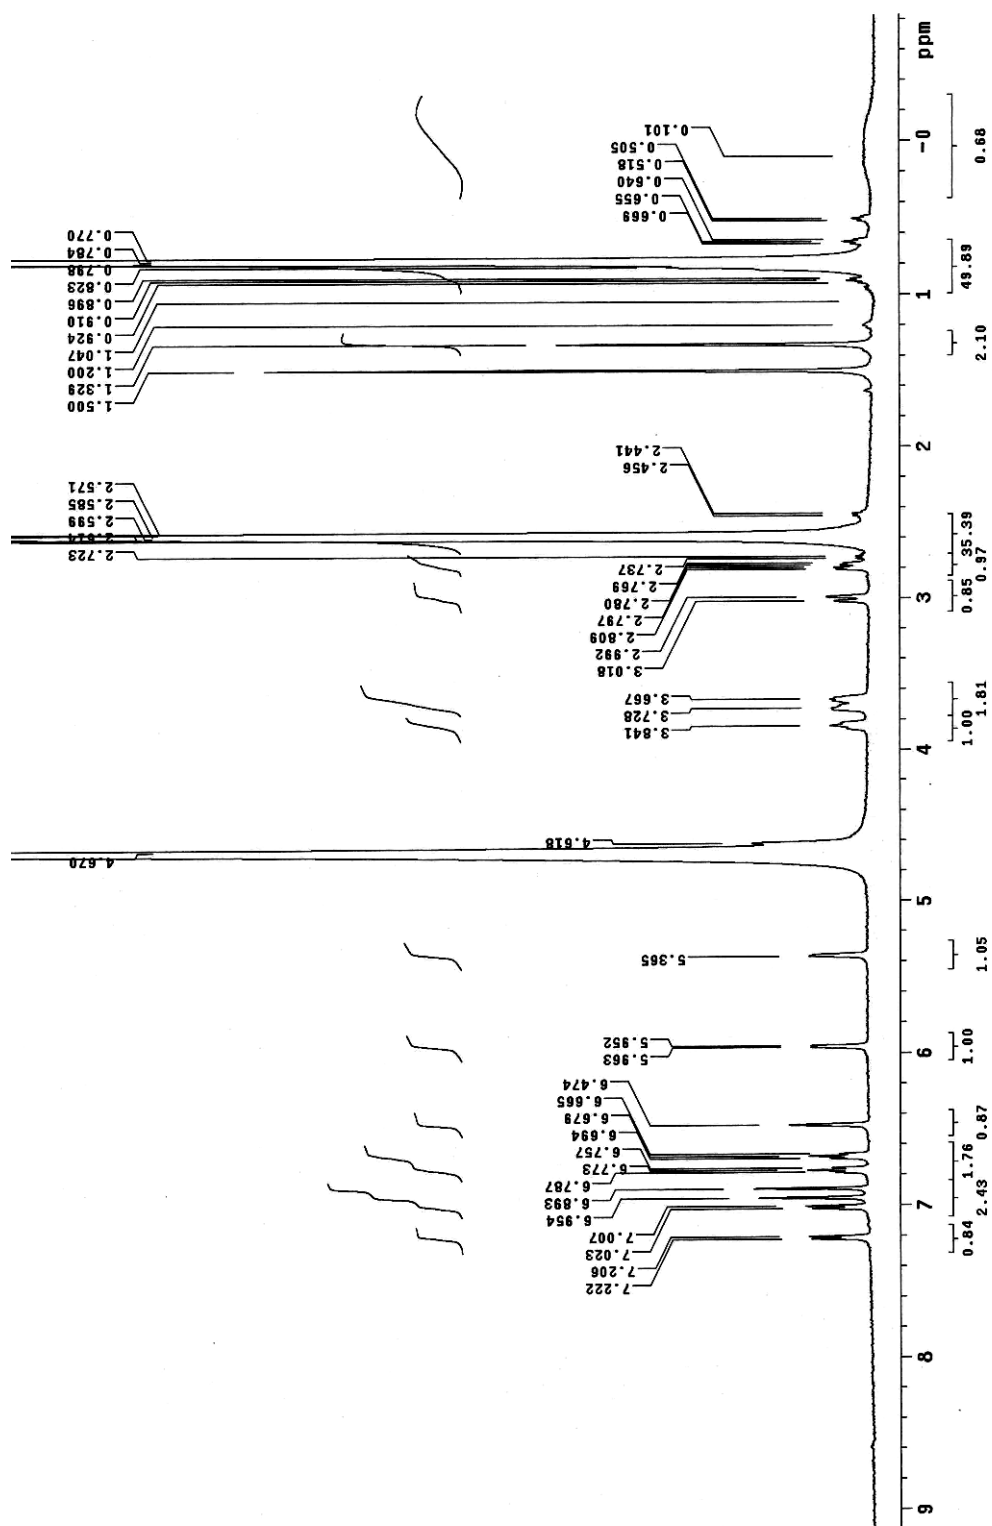

Figure S13. 6a <sup>1</sup>H-NMR in D<sub>2</sub>O 500 MHz 2 °C.

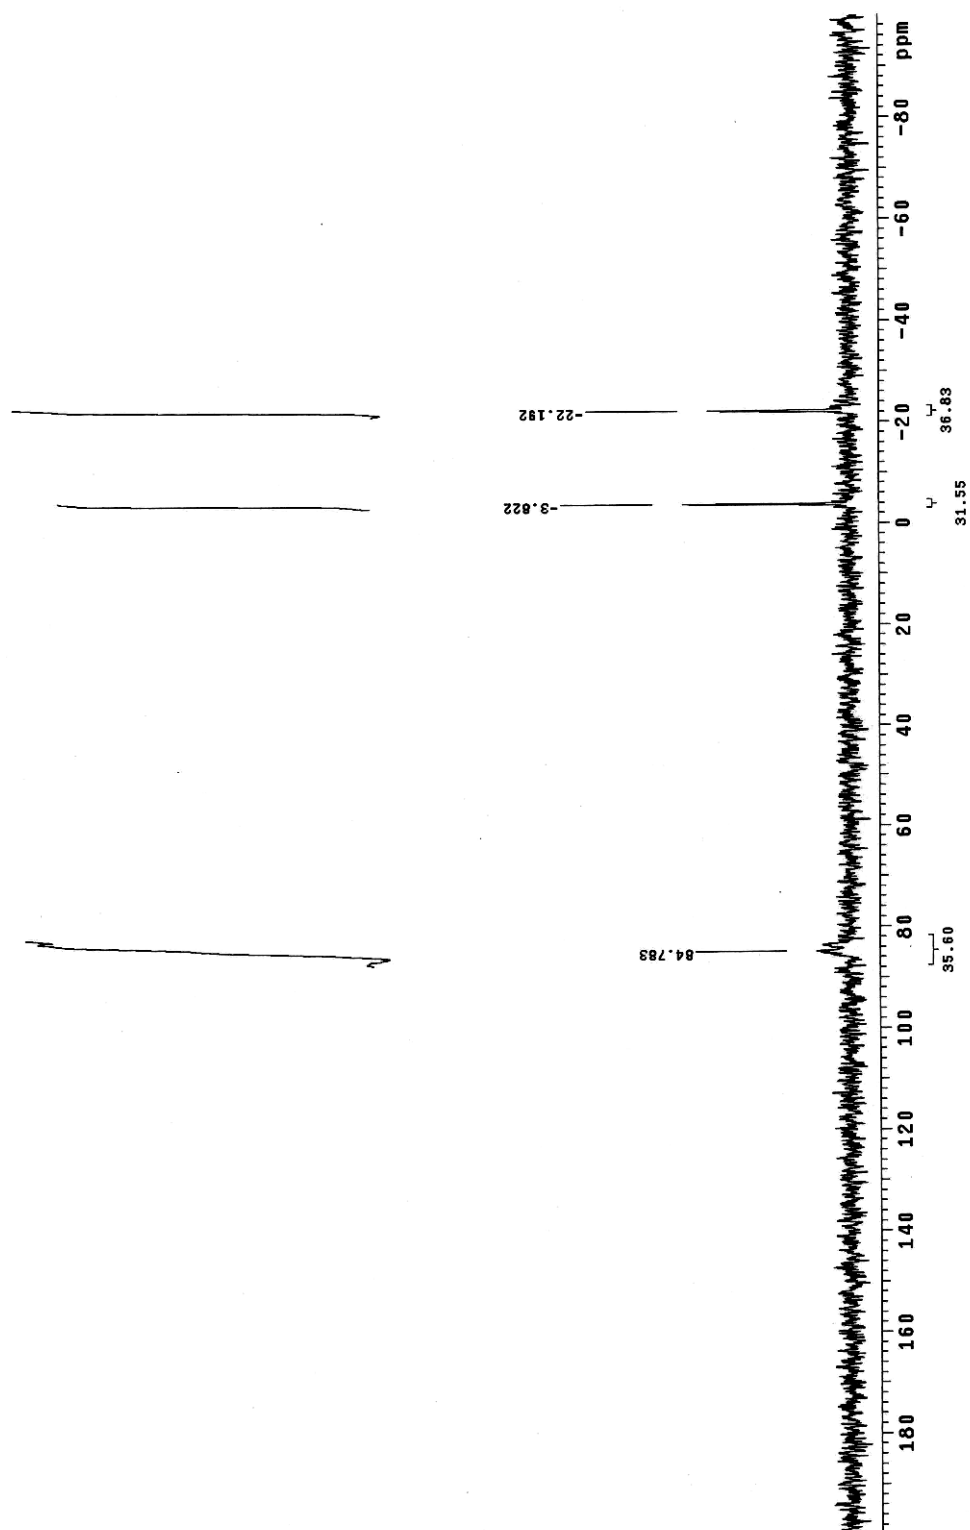

**Figure S14. 6a**  $^{31}\text{P}$ -NMR in  $\text{D}_2\text{O}$  202 MHz 2 °C.

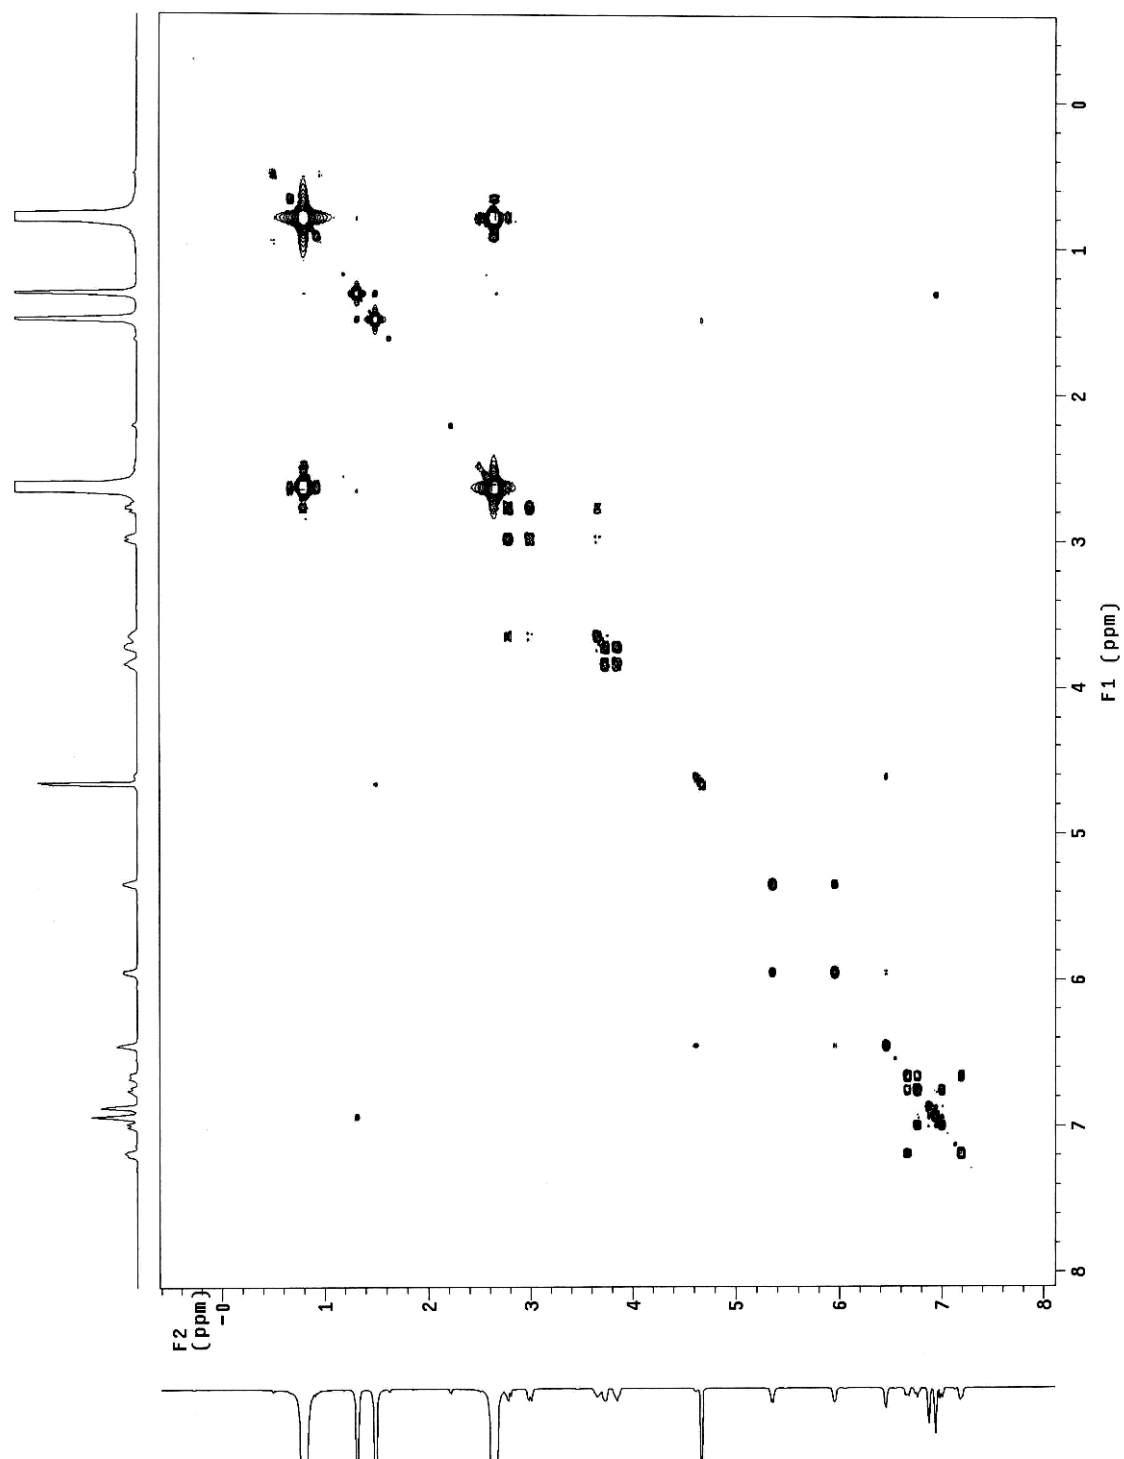

Figure S15. 6a COSY in D<sub>2</sub>O 500 MHz 2 °C.

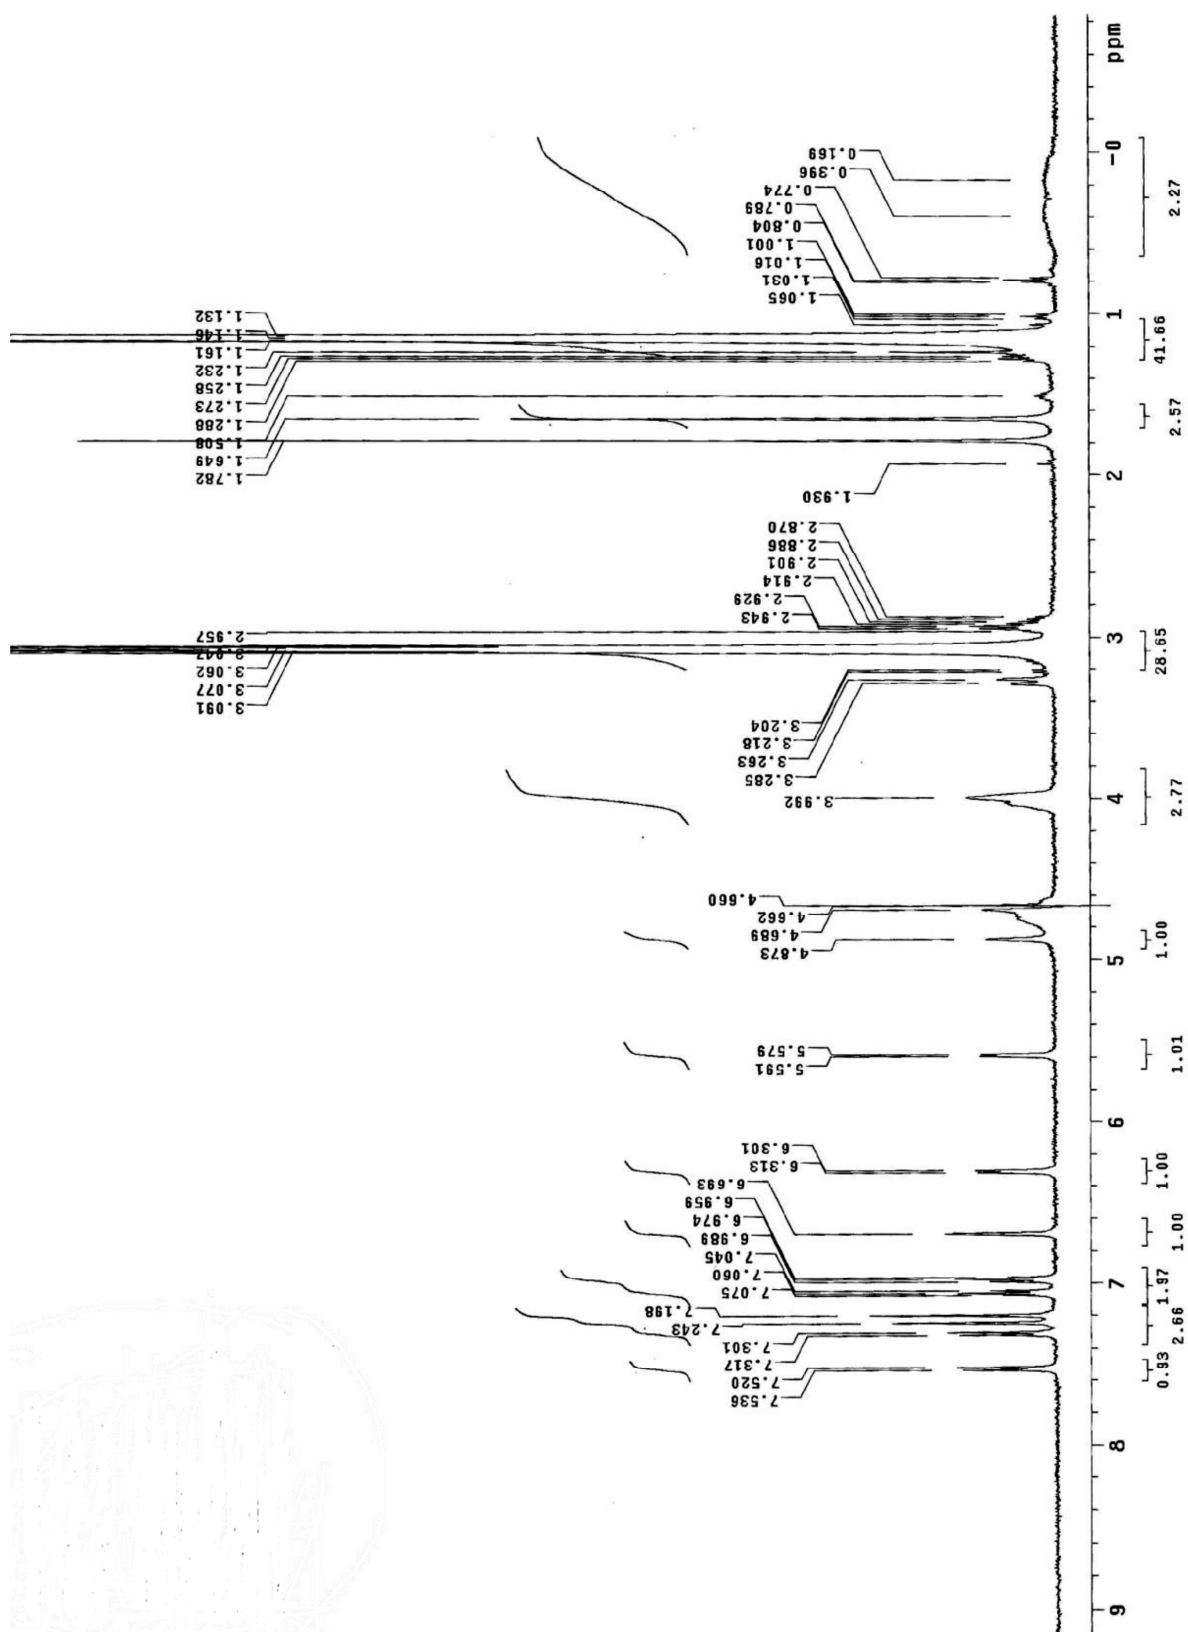

Figure S16. **6b**  $^1\text{H}$ -NMR in  $\text{D}_2\text{O}$  500 MHz 25 °C Water Presat.

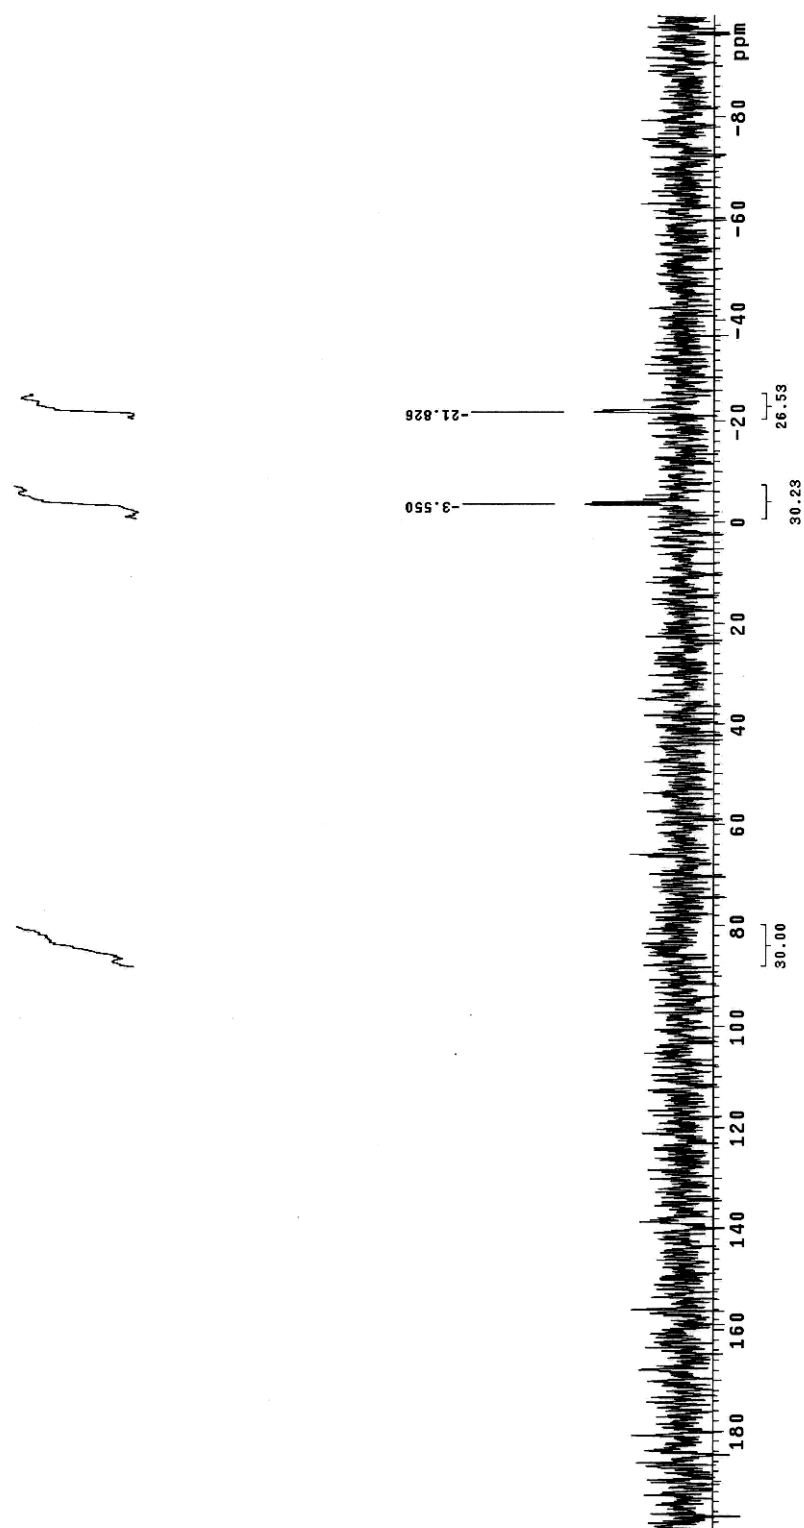

**Figure S17. 6b** <sup>31</sup>P-NMR in D<sub>2</sub>O 202 MHz 2 °C.

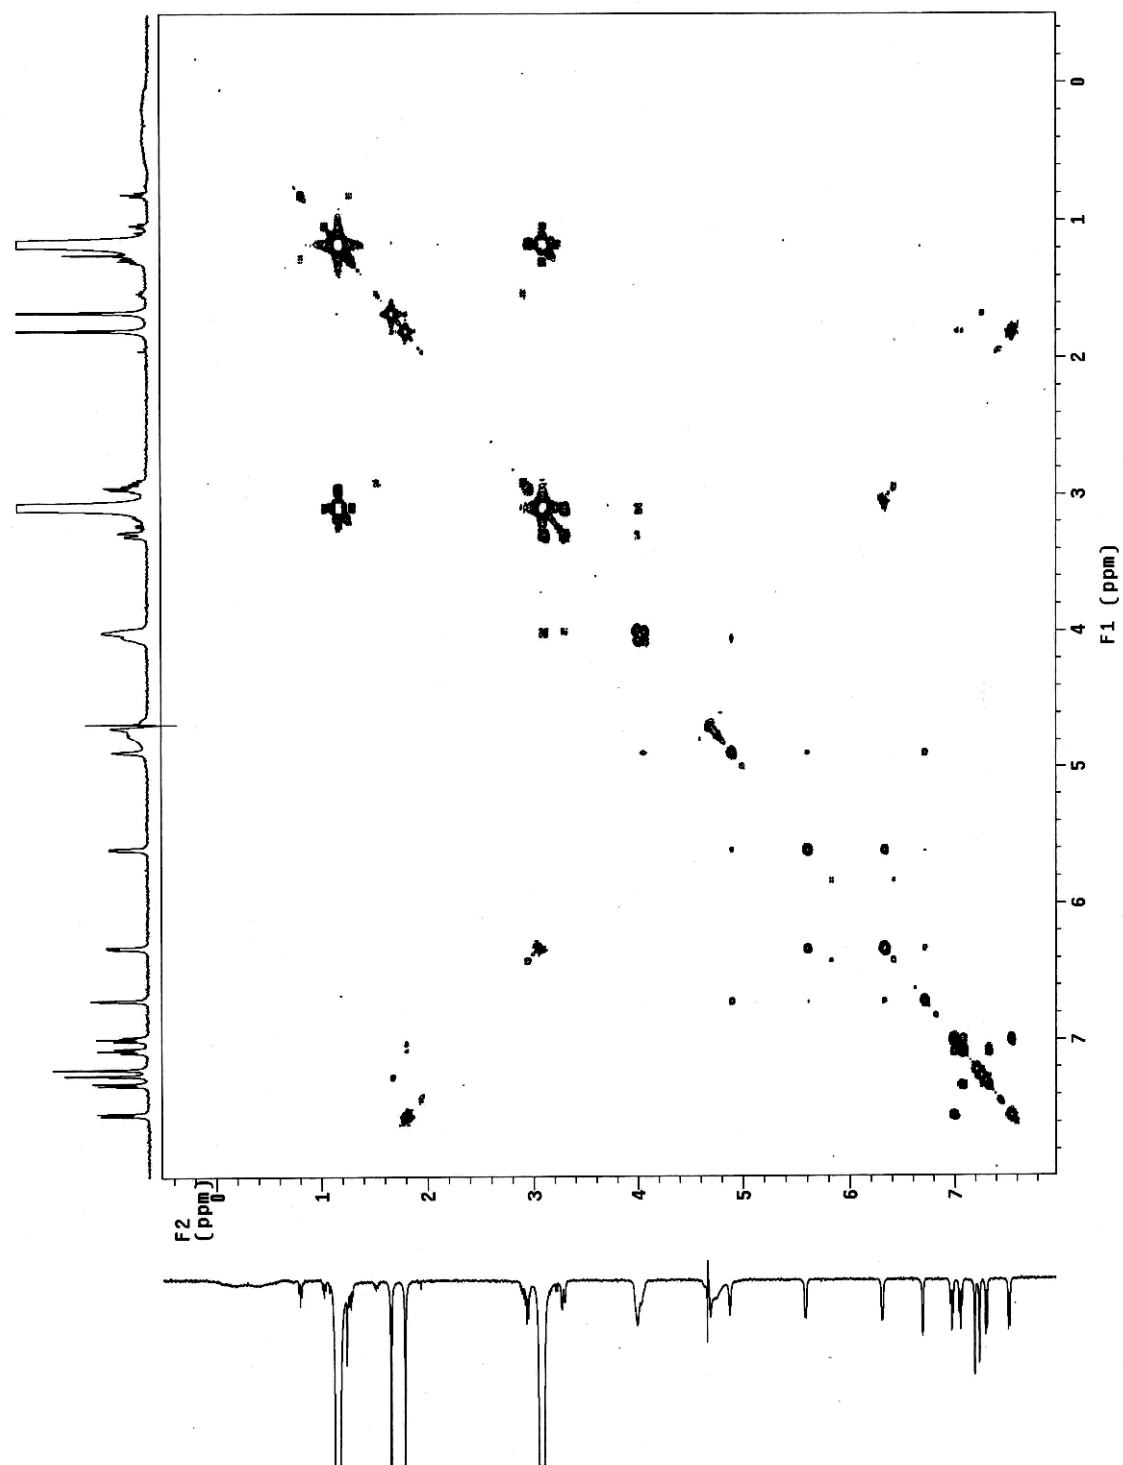

Figure S18. 6b COSY in D<sub>2</sub>O 500 MHz 25 °C.



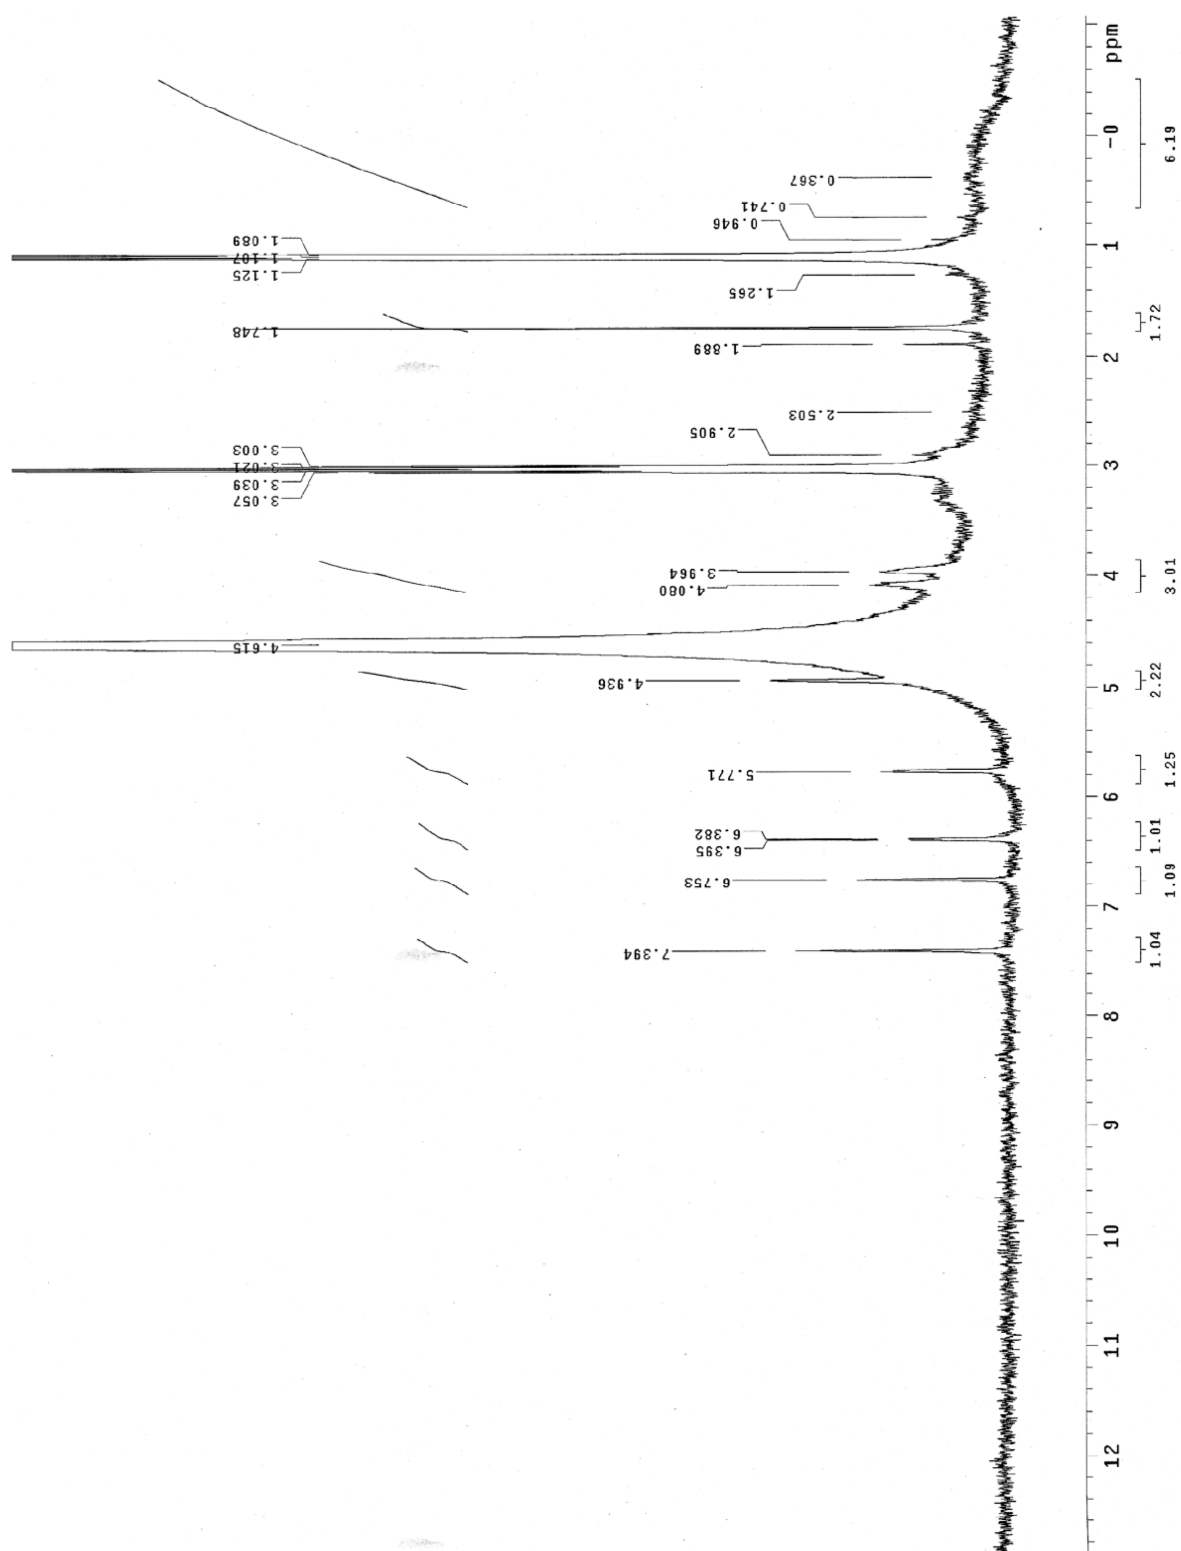

**Figure S19.** d4TTP $\alpha$ B Rp  $^1\text{H}$ -NMR in  $\text{D}_2\text{O}$  400 MHz 25 °C.

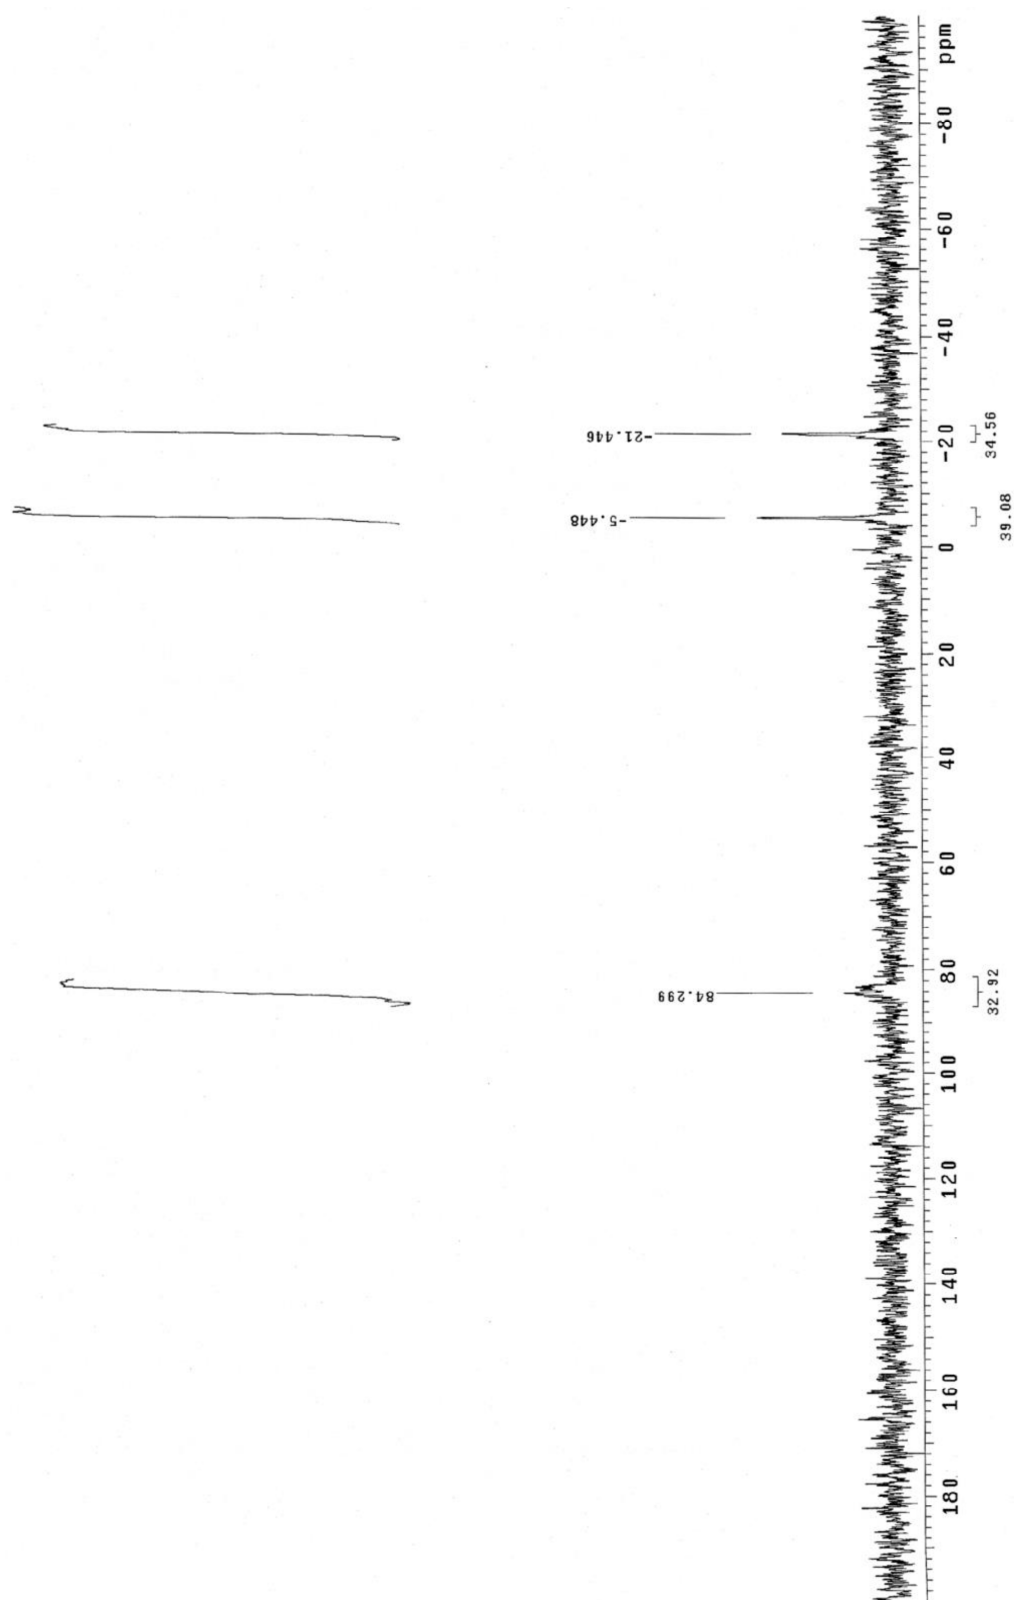

**Figure S20.** d4TTP $\alpha$ B  $R_p$   $^{31}\text{P}$ -NMR in  $\text{D}_2\text{O}$  202 MHz 25 °C.

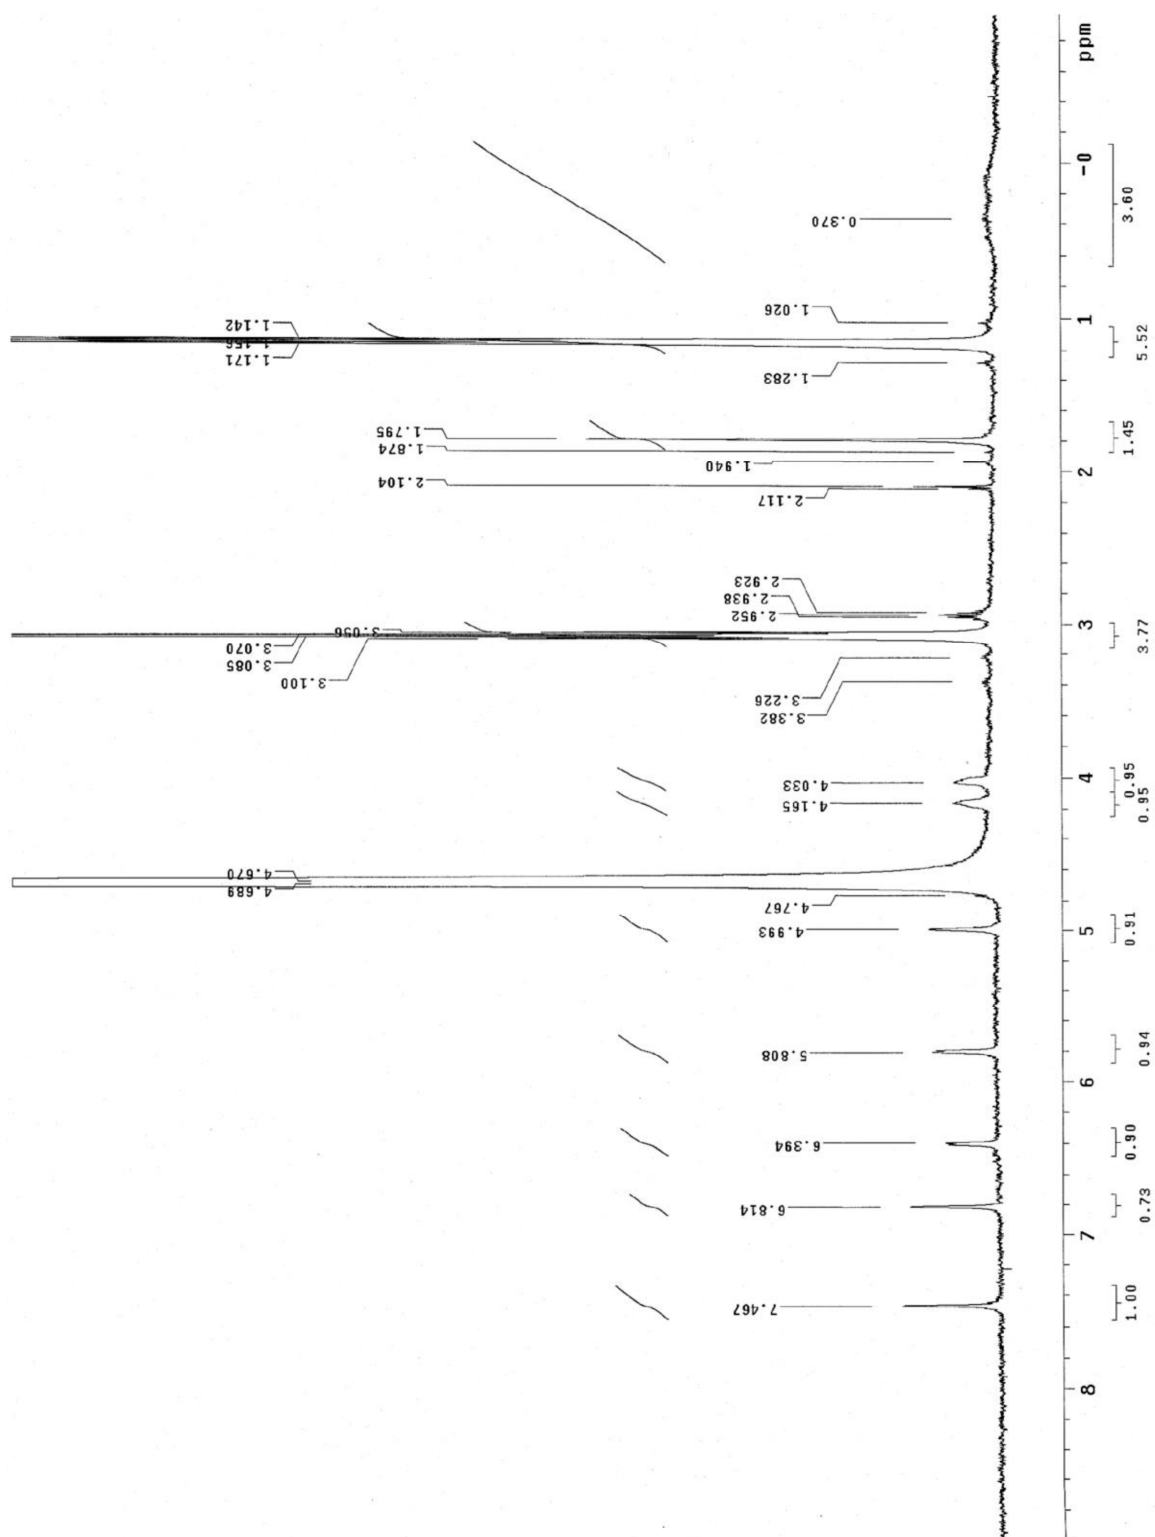

**Figure S21.** d<sub>4</sub>TTPaB Sp <sup>1</sup>H-NMR in D<sub>2</sub>O 500 MHz 25 °C.

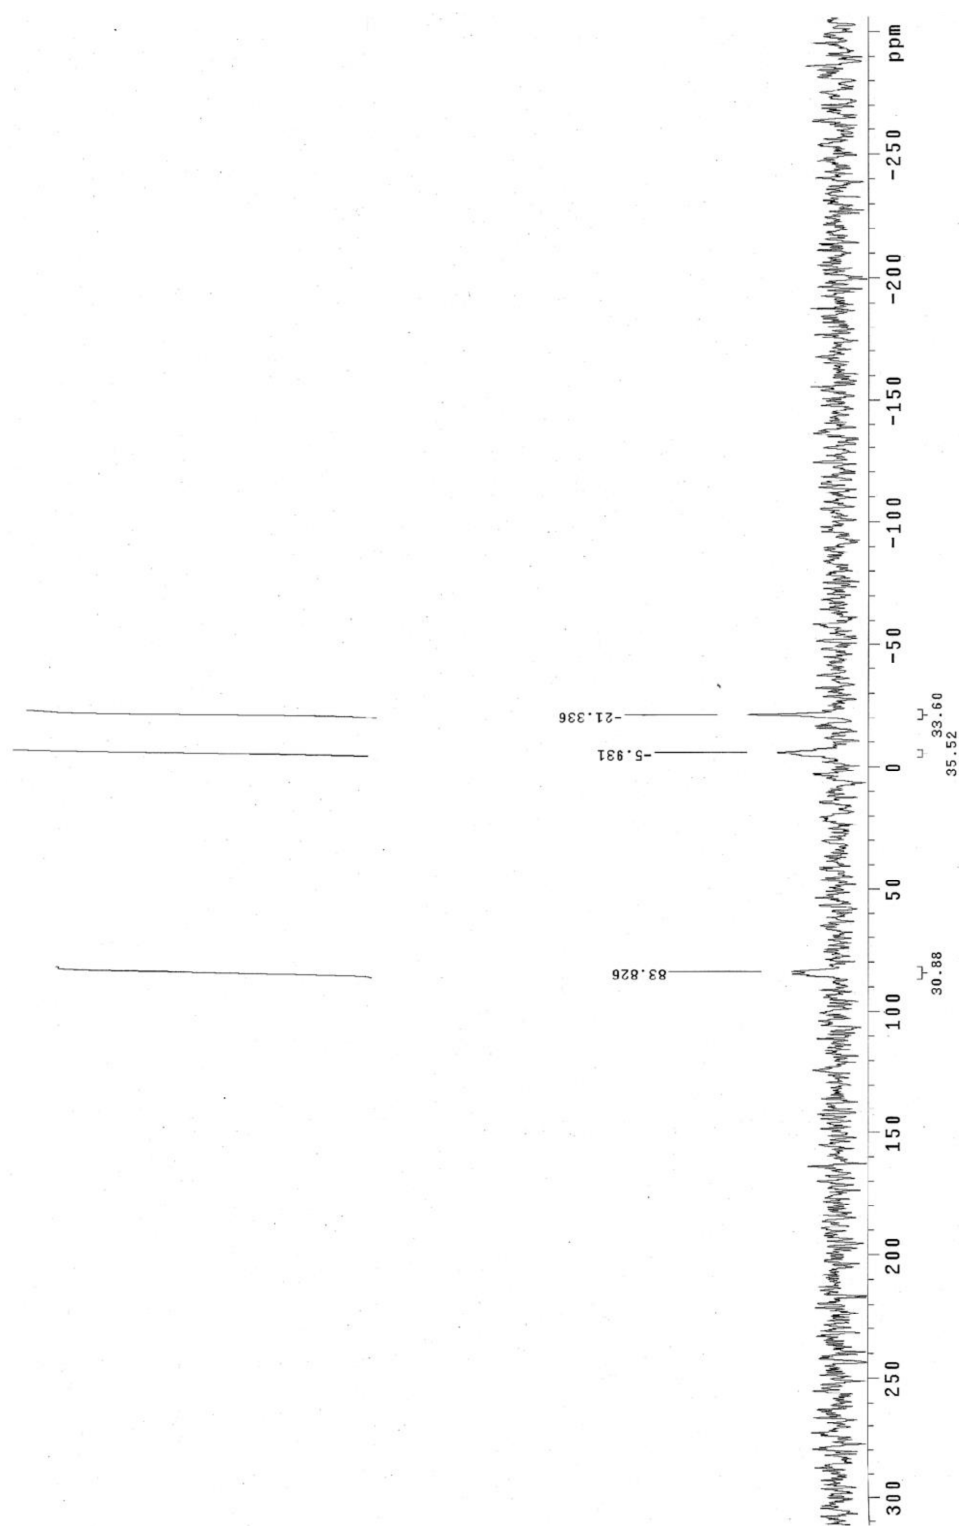

**Figure S22.** d4TTP $\alpha$ B  $^{31}\text{P}$ -NMR in D<sub>2</sub>O 162 MHz 25 °C.
